# Supplementary material
Source: publisher site journal article supplement (https://spandidos-publications.com/2899/downloadSupplementary)
Supplement: Supplementary file 1 [file downloadSupplementary]

## Sheet: Table SII
Table SII. Total differentially expressed proteins.
UniProt ID	Gene name	Change type	LFQ intensity AP-1	LFQ intensity AP-2	LFQ intensity AP-3	LFQ intensity EC-1	LFQ intensity EC-2	LFQ intensity EC-3	Ratio EC_AP	P-value EC_AP
P78527	PRKDC	Up	29.5932	29.5976	29.5521	31.175	31.1693	31.1781	3.01716	4.33247e-08
P35606	COPB2	Up	28.6645	28.6441	28.652	29.7848	29.8143	29.814	2.22043	5.82847e-08
Q14204	DYNC1H1	Up	29.6138	29.6106	29.5761	31.2502	31.2649	31.3072	3.19082	1.45871e-07
A0A0C4DGS1	DDOST	Up	28.4667	28.4939	28.4895	30.4419	30.5153	30.5261	4.03082	2.17211e-07
Q96HE7	ERO1A	Up	27.4978	27.4738	27.474	29.3405	29.2748	29.3587	3.58704	2.63936e-07
Q00610	CLTC	Up	31.6687	31.6923	31.6349	33.0374	33.0002	33.026	2.55957	2.8086e-07
E7EQB2	LTF	Up	29.0991	29.2468	29.2974	33.0879	33.0206	33.0699	14.3706	4.25797e-07
P27695	APEX1	Up	28.5489	28.4792	28.4733	29.8021	29.8015	29.787	2.45614	7.96436e-07
F5GZS6	SLC3A2	Up	24.2986	24.3233	24.3469	27.2038	27.037	27.0333	6.81357	1.14751e-06
Q9Y394	DHRS7	Up	20.7813	21.0235	21.0894	25.7898	25.6859	25.6816	26.9902	1.17688e-06
P48735	IDH2	Up	31.1536	31.1964	31.1837	32.2742	32.2206	32.2935	2.1212	1.74842e-06
P54687	BCAT1	Up	25.1623	25.2407	25.0763	28.3402	28.1391	28.212	8.40144	2.19311e-06
P16615	ATP2A2	Up	28.0167	28.0599	27.9845	29.4964	29.4016	29.4365	2.68414	2.24213e-06
P13796	LCP1	Up	29.6943	29.7518	29.72	31.4204	31.463	31.5571	3.38263	2.27713e-06
A0A0A0MRM8	MYO6	Up	27.0996	27.1028	27.1686	28.6425	28.7244	28.7531	2.99593	2.44559e-06
B4DI03	SEC11C	Up	24.1438	24.0763	24.3764	28.0549	28.0735	27.9633	14.239	2.45959e-06
Q8WU39	MZB1	Up	27.0426	27.0321	27.249	29.9	29.9197	29.9347	7.0138	2.47799e-06
P05164	MPO	Up	28.0687	28.1715	28.1702	29.441	29.4484	29.4582	2.48348	2.8235e-06
P21964	COMT	Up	28.3695	28.3702	28.3845	29.8588	29.7361	29.7677	2.66258	2.84693e-06
H7C2G7	RENBP	Up	21.0235	21.0228	21.1945	23.9814	24.117	23.928	7.61337	3.35692e-06
P01857	IGHG1	Up	33.7387	33.754	33.7811	34.8582	34.9596	34.9227	2.22769	3.55154e-06
F5H1C6	FERMT3	Up	22.9251	22.8208	23.1167	26.6656	26.8879	26.7275	13.9883	4.02058e-06
P04843	RPN1	Up	29.7807	29.814	29.8691	30.9699	31.0381	30.9763	2.25553	4.06431e-06
C9JB29	CASP8	Up	21.9992	21.891	22.059	24.6086	24.7763	24.5833	6.37755	4.3269e-06
P01833	PIGR	Up	29.716	29.6788	29.6677	30.7587	30.671	30.6975	2.03018	4.32738e-06
Q9Y6N5	SQOR	Up	27.1343	27.1217	27.2472	28.6346	28.586	28.6114	2.71877	4.40299e-06
P13639	EEF2	Up	31.2045	31.1554	31.2662	32.399	32.4294	32.4581	2.32971	4.67373e-06
A0A087WXI2	FCGBP	Up	28.216	28.1679	28.2227	29.2969	29.2024	29.2662	2.07483	5.56994e-06
Q92890	UFD1	Up	23.1395	22.9199	22.9296	27.5707	27.1984	27.5486	21.7496	5.92122e-06
P42224	STAT1	Up	27.3545	27.586	27.5944	30.2345	30.3697	30.2696	6.867	6.10527e-06
Q08AF3	SLFN5	Up	26.1225	26.0703	25.9943	27.9237	27.7791	27.9003	3.49506	6.4575e-06
Q13576	IQGAP2	Up	26.0457	26.0324	26.2138	28.1278	28.1322	28.0401	4.00756	6.87696e-06
J3QSA1	TRAPPC8	Up	21.2937	21.6772	21.2806	25.4849	25.4038	25.4381	16.2807	6.9282e-06
Q99832	CCT7	Up	28.962	28.8953	29.0132	30.0907	30.0715	30.0448	2.1617	7.02118e-06
D6RBV2	LMAN2	Up	27.0289	27.019	27.1855	28.7147	28.696	28.7097	3.09305	7.29863e-06
P59535	TAS2R40	Up	22.2857	22.1324	21.9491	25.8204	26.0774	26.0986	14.6867	8.04304e-06
Q9Y3Z3	SAMHD1	Up	29.1859	28.977	28.9715	31.1223	31.1109	31.1326	4.21971	8.04962e-06
P07814	EPRS1	Up	28.0953	28.1431	28.2153	29.3334	29.2926	29.2702	2.21534	8.33754e-06
P19971	TYMP	Up	28.355	28.4326	28.2391	30.4498	30.6271	30.5675	4.61356	8.67029e-06
P53618	COPB1	Up	27.4843	27.7278	27.5879	29.6277	29.6555	29.6484	4.12343	8.68748e-06
Q13630	TSTA3	Up	26.6675	26.6934	26.5807	27.8901	27.899	27.9882	2.42596	1.02059e-05
P55060	CSE1L	Up	31.2658	31.2	31.1184	32.6675	32.6559	32.5703	2.70662	1.05954e-05
A0A499FJL1	PREP	Up	27.6586	27.5654	27.6256	28.7773	28.695	28.683	2.14637	1.06412e-05
O75643	SNRNP200	Up	28.3341	28.377	28.4951	29.7403	29.791	29.7792	2.5813	1.10374e-05
Q96EK6	GNPNAT1	Up	25.6194	25.7091	25.6809	26.8902	26.9532	27.028	2.44079	1.13423e-05
P53396	ACLY	Up	27.6436	27.6832	27.8302	29.4007	29.4407	29.3509	3.20085	1.13901e-05
P68371	TUBB4B	Up	32.7429	32.6336	32.764	33.8409	33.8926	33.8734	2.22751	1.15453e-05
Q9H9B4	SFXN1	Up	24.745	24.6734	24.689	25.7264	25.738	25.832	2.08926	1.17879e-05
H0YMF4	RPL28	Up	25.9117	25.8026	25.82	28.2898	28.5379	28.2529	5.71761	1.24307e-05
Q14152	EIF3A	Up	27.8253	27.7715	27.8728	28.819	28.9053	28.8362	2.0425	1.27031e-05
Q14974	KPNB1	Up	29.0014	28.8272	29.0195	30.7104	30.6224	30.6596	3.28241	1.33448e-05
E9PKG1	PRMT1	Up	27.7659	27.6234	27.6936	28.8033	28.8573	28.8165	2.1908	1.38601e-05
F8WEP1	KYNU	Up	22.709	22.7057	22.5635	25.4394	25.1821	25.1552	6.06087	1.43555e-05
G3V1C3	API5	Up	26.1006	26.2	26.3467	28.0839	28.034	28.0522	3.58242	1.46271e-05
P19367	HK1	Up	28.2602	28.3342	28.1993	29.4427	29.3954	29.4848	2.26008	1.48343e-05
A0A5F9ZH85	ATXN2	Up	21.5836	21.6518	21.4329	23.5758	23.6057	23.456	3.97157	1.49164e-05
P08575	PTPRC	Up	24.3981	24.0846	24.3164	27.2707	27.3714	27.118	7.92812	1.5114e-05
P01876	IGHA1	Up	30.4191	30.2599	30.3067	32.2737	32.1371	32.0854	3.5722	1.51255e-05
P26640	VARS1	Up	27.4376	27.5793	27.6011	28.839	28.8574	28.8231	2.46313	1.5403e-05
Q9UL46	PSME2	Up	29.248	29.162	29.0326	30.8927	30.845	30.7976	3.24348	1.56212e-05
Q92538	GBF1	Up	22.5022	22.2768	22.3122	24.4424	24.6232	24.5673	4.53332	1.57822e-05
O43760	SYNGR2	Up	25.2039	25.0648	25.1776	27.2185	27.0756	26.9882	3.85128	1.6587e-05
Q9Y376	CAB39	Up	26.0071	25.9381	26.029	27.5611	27.689	27.4864	3.00522	1.68691e-05
B3KYB7	PITPNB	Up	26.1969	26.1399	26.25	27.705	27.5892	27.5396	2.66791	1.71899e-05
P00338	LDHA	Up	31.6052	31.6859	31.5752	32.9192	32.9572	32.8195	2.4226	1.72394e-05
P32455	GBP1	Up	26.2853	26.6442	26.5739	29.3129	29.2347	29.2112	6.73558	1.7491e-05
Q7L576	CYFIP1	Up	27.2418	27.2439	27.1585	28.2415	28.3653	28.3238	2.13688	1.84145e-05
Q9NYU2	UGGT1	Up	26.984	26.8743	27.0119	28.3398	28.4362	28.2949	2.63942	1.88994e-05
Q9HCC0	MCCC2	Up	26.4255	26.4819	26.5252	27.4898	27.611	27.5676	2.11196	1.9136e-05
P41252	IARS1	Up	26.7012	26.8589	26.751	28.7875	29.0596	28.9765	4.50286	1.99698e-05
Q9H4A4	RNPEP	Up	28.2159	28.3276	28.2379	29.8721	29.6958	29.7219	2.83397	2.03237e-05
P53004	BLVRA	Up	27.2515	27.2575	27.1718	28.1948	28.2432	28.3132	2.03278	2.04183e-05
O43776	NARS1	Up	27.3426	27.3641	27.2995	28.7089	28.6215	28.8175	2.60368	2.08288e-05
Q15029	EFTUD2	Up	27.3852	27.4591	27.3109	28.4903	28.478	28.5557	2.17794	2.16429e-05
Q92598	HSPH1	Up	27.533	27.7521	27.6895	29.2752	29.2389	29.1964	2.9869	2.16513e-05
A0A0G2JMH6	HLA-DRA	Up	28.1368	28.2331	28.1172	30.0249	30.2526	30.2807	4.06627	2.17462e-05
A0A3B3IRW2	MOGS	Up	26.4124	26.4624	26.2199	28.0698	28.1256	28.1379	3.35471	2.22104e-05
A0A087WW66	PSMD1	Up	27.4883	27.5678	27.5118	28.7549	28.9382	28.8211	2.48876	2.327e-05
P52209	PGD	Up	28.8102	28.9519	28.9526	30.0605	30.1421	30.1339	2.30899	2.36885e-05
Q8NFF5	FLAD1	Up	22.401	22.3673	22.7105	24.9608	25.046	25.0652	5.77999	2.42082e-05
Q00325	SLC25A3	Up	28.1386	28.1982	28.3252	29.6802	29.7065	29.5896	2.70963	2.53217e-05
P22059	OSBP	Up	26.5356	26.6382	26.5381	27.9884	28.1226	27.9302	2.71907	2.62706e-05
Q68E01	INTS3	Up	22.8569	22.3465	22.4963	26.1694	26.4346	26.2432	13.1393	2.64367e-05
O14617	AP3D1	Up	26.1884	25.9123	25.9828	27.91	27.9103	27.8425	3.62947	2.68153e-05
Q9Y277	VDAC3	Up	27.4795	27.5422	27.4734	28.887	28.881	29.0741	2.73011	2.71851e-05
Q9Y6D6	ARFGEF1	Up	23.6302	23.6123	23.6041	25.5744	25.2837	25.4657	3.54479	2.79685e-05
Q9HC84	MUC5B	Up	30.4366	30.4119	30.5795	31.5883	31.5998	31.6111	2.17914	2.85032e-05
Q03519	TAP2	Up	24.8727	25.1567	25.2459	27.6438	27.58	27.5313	5.63032	2.8814e-05
A0A087WUD3	OSTC	Up	25.65	25.7924	25.6729	26.9629	26.9705	27.0948	2.46961	2.91261e-05
C9J128	INPP1	Up	23.6371	23.4623	23.3888	25.0588	25.069	25.0525	2.95682	2.93182e-05
Q9Y678	COPG1	Up	26.8162	26.5155	26.4453	29.034	29.0803	29.1442	5.63277	2.97817e-05
F2Z3J9	PTGR1	Up	26.7052	26.5976	26.5476	27.8274	27.7589	27.7266	2.22552	3.08629e-05
P50453	SERPINB9	Up	25.3437	25.3566	25.2957	26.8735	26.6473	26.7989	2.71554	3.1163e-05
Q92896	GLG1	Up	26.0577	26.1751	26.1879	27.3961	27.5687	27.4958	2.54312	3.19907e-05
P04233	CD74	Up	25.974	25.8761	25.8442	27.4955	27.3077	27.5015	2.90153	3.28628e-05
P04844	RPN2	Up	28.8373	29.0165	28.7629	30.5603	30.5047	30.4647	3.11165	3.39909e-05
E7EX73	EIF4G1	Up	27.0244	26.8571	27.1133	28.8637	28.985	29.0774	3.93703	3.46666e-05
O00410	IPO5	Up	26.205	26.2393	26.322	28.5128	28.33	28.1786	4.24278	3.47489e-05
P01602	IGKV1-5	Up	21.1981	20.9139	21.4931	24.9172	25.0258	25.2285	14.4746	3.51709e-05
Q6P2Q9	PRPF8	Up	27.5666	27.5646	27.3599	28.9685	29.0336	28.946	2.80045	3.51948e-05
O14980	XPO1	Up	27.4738	27.6554	27.7472	29.2969	29.2584	29.3207	3.17445	3.52048e-05
P12236	SLC25A6	Up	29.8381	29.6522	29.5527	31.3889	31.4243	31.4666	3.35328	3.57702e-05
Q9Y295	DRG1	Up	22.4226	22.3838	22.5525	23.8578	23.7135	23.7658	2.5071	3.66586e-05
C9JJT5	ATP5MF-PTCD1	Up	27.7519	27.9325	27.9996	29.443	29.4016	29.4804	2.922	3.69303e-05
G5E9W3	CPSF3	Up	21.465	21.5771	21.8127	24.7344	24.8598	25.1731	9.87788	3.74718e-05
A0A140T958	HLA-DRB1	Up	27.0993	26.8715	26.9645	28.8417	28.9792	28.7385	3.66726	4.06742e-05
J3QRD1	ALDH3A2	Up	25.3186	25.2498	25.2755	26.3922	26.2338	26.377	2.07491	4.1647e-05
J3QRN6	MYO1D	Up	24.5511	24.5539	24.3832	25.8698	25.7492	25.774	2.46507	4.22772e-05
O00429	DNM1L	Up	26.8264	26.8657	26.963	28.0275	27.9507	28.0991	2.20491	4.23163e-05
P23381	WARS1	Up	28.2919	28.315	28.0001	30.2101	30.3411	30.2682	4.20124	4.38548e-05
Q9P2J5	LARS1	Up	26.3403	26.2053	26.3491	28.4911	28.2672	28.1727	4.03371	4.40826e-05
P61160	ACTR2	Up	28.8222	28.7452	28.8729	29.8311	29.962	29.8412	2.09173	4.53497e-05
Q06210	GFPT1	Up	25.7788	25.6298	25.2603	28.6934	28.6141	28.5247	8.30757	4.61866e-05
P53621	COPA	Up	28.3944	28.5833	28.3353	29.8411	29.8867	29.8911	2.70439	4.74778e-05
J3KQ72	FBXO6	Up	20.0497	20.3702	19.6897	23.8505	23.7084	23.8773	13.6947	4.95799e-05
H3BRY6	INTS14	Up	20.3123	20.5607	20.2293	22.6497	22.4793	22.4406	4.45612	5.36414e-05
O15371	EIF3D	Up	26.6903	26.4627	26.5372	27.7914	27.8586	27.8394	2.40556	5.46846e-05
O43143	DHX15	Up	27.8941	27.9814	28.1346	29.3829	29.306	29.302	2.50863	6.00962e-05
A0A5F9ZH82	ACP2	Up	24.2371	24.2625	24.2771	26.1411	25.934	25.8135	3.25801	6.01064e-05
P49327	FASN	Up	28.5955	28.7764	28.9535	30.6922	30.6819	30.6083	3.69524	6.01956e-05
H0YHM7	FKBP11	Up	23.1506	23.0731	23.4147	25.26	25.3219	25.1465	4.08406	6.14335e-05
Q15005	SPCS2	Up	27.3442	27.2844	27.4378	28.8358	29.1122	28.9474	3.05183	6.23445e-05
P32969	RPL9	Up	27.6846	27.8003	27.8189	29.1343	29.1151	28.9415	2.45493	6.3607e-05
P62820	RAB1A	Up	29.1495	28.9842	28.9821	30.0973	30.0962	30.1852	2.12531	6.51568e-05
O95352	ATG7	Up	23.5867	23.7102	23.7233	25.5669	25.5079	25.2642	3.41748	6.51905e-05
Q13619	CUL4A	Up	26.5373	26.182	26.3426	28.6698	28.4539	28.4514	4.50353	6.5876e-05
B4DKY1	CARS1	Up	24.2605	24.1929	24.3623	25.396	25.4276	25.5539	2.27729	6.66111e-05
O95373	IPO7	Up	25.8274	26.1948	26.1111	27.9552	27.9799	27.9543	3.78089	6.69125e-05
P05141	SLC25A5	Up	26.7748	26.7881	26.6267	28.3889	28.7094	28.5534	3.53253	6.74026e-05
Q92616	GCN1	Up	26.9879	27.1274	26.757	29.0258	28.962	28.8759	3.99211	6.77383e-05
Q5QPP1	GALE	Up	24.4828	24.8519	24.6001	26.6986	26.6798	26.8566	4.28721	6.78817e-05
H3BNF0	NUBP2	Up	22.0936	22.2253	22.6952	25.532	25.6941	25.5458	9.53081	6.80127e-05
Q86US8	SMG6	Up	23.4331	23.2033	23.5588	25.6407	25.8575	25.5715	4.89558	7.08877e-05
Q99805	TM9SF2	Up	24.9568	24.9351	25.5211	28.4269	28.6165	28.4912	10.3665	7.20071e-05
F8VPD4	CAD	Up	25.7242	25.6031	25.745	27.6842	27.7265	27.3938	3.76004	7.31068e-05
P40306	PSMB10	Up	25.5506	25.3919	25.5958	26.7868	26.9609	26.934	2.60478	7.34118e-05
P31939	ATIC	Up	29.2185	29.2871	29.4135	30.313	30.3974	30.401	2.0909	7.63781e-05
K7EKW4	ISOC2	Up	24.1032	24.0975	23.9725	25.3228	25.4144	25.5669	2.59719	7.71908e-05
O43818	RRP9	Up	21.1833	21.1627	21.2491	24.4285	25.0513	24.4295	10.8384	8.00173e-05
Q86XA9	HEATR5A	Up	23.5321	23.7109	23.1353	26.2354	26.2959	26.3058	7.05952	8.0137e-05
Q9Y262	EIF3L	Up	26.5626	26.4018	26.6413	27.7734	27.7518	27.7018	2.30876	8.08893e-05
P62277	RPS13	Up	26.3649	26.5087	26.2633	27.8171	27.6672	27.7776	2.59375	8.20832e-05
P08240	SRPRA	Up	23.773	23.7873	24.0251	25.2619	25.272	25.1995	2.60754	8.2973e-05
P47897	QARS1	Up	26.959	26.9519	26.8529	28.261	28.5455	28.4799	2.84314	8.32037e-05
E9PC44	SEC24D	Up	24.8843	24.8579	24.947	26.0883	26.0885	26.3088	2.4041	8.47682e-05
Q9UNM6	PSMD13	Up	27.212	27.4025	27.1374	28.6586	28.559	28.6201	2.57027	8.50467e-05
P13611	VCAN	Up	28.531	28.3628	28.5332	29.7207	29.5708	29.6184	2.23611	8.50743e-05
Q6ZXV5	TMTC3	Up	22.0907	22.1392	21.9095	24.344	24.4692	24.0632	4.74263	8.56481e-05
P49736	MCM2	Up	22.8161	22.1642	22.5681	25.8819	26.2746	26.0888	11.8402	8.67148e-05
P00846	MT-ATP6	Up	26.3603	26.2076	26.4464	27.5522	27.6291	27.5242	2.34634	8.75217e-05
P19525	EIF2AK2	Up	26.4295	26.3226	26.5421	27.6161	27.5179	27.6292	2.22882	9.01064e-05
Q8MH48	HLA-G	Up	21.447	22.129	21.9527	25.0719	25.1293	25.1904	9.76517	9.2273e-05
P68431	H3C1	Up	21.1048	21.1673	21.8344	25.5028	25.643	25.2448	17.0857	9.64196e-05
E9PR16	NUP160	Up	22.6346	22.6442	22.5775	24.5568	24.951	24.9973	4.64701	9.64761e-05
A0A140T9T7	TAP1	Up	21.8512	20.9588	21.7749	25.9907	26.0961	26.2131	23.7794	9.8169e-05
P30153	PPP2R1A	Up	28.3653	28.491	28.3044	29.5217	29.5302	29.3946	2.13652	9.89606e-05
P29350	PTPN6	Up	25.5503	25.4368	25.7743	27.1349	27.2265	27.2185	3.04437	0.000100303
O14933	UBE2L6	Up	24.2162	24.2776	24.0056	26.4153	26.0981	26.1171	4.12312	0.000100547
P17858	PFKL	Up	28.5729	28.6379	28.7931	29.7443	29.8184	29.731	2.13844	0.000101184
P04839	CYBB	Up	25.2021	24.8282	25.0051	26.7552	26.7069	26.821	3.36177	0.000101412
H0YBR2	ESRP1	Up	21.756	22.111	21.6907	24.2943	24.0559	24.117	4.93525	0.000101915
P26639	TARS1	Up	27.7975	27.6342	27.5127	28.938	28.9373	28.9126	2.43037	0.000102435
P20591	MX1	Up	25.8476	24.6034	25.2386	30.7764	30.7599	30.7559	46.3398	0.000103638
Q08380	LGALS3BP	Up	29.5738	29.4494	29.3511	30.5621	30.4831	30.5023	2.08163	0.000103734
Q9NZB2	FAM120A	Up	25.8032	25.9038	25.6345	27.2365	27.0841	27.1569	2.60032	0.000106243
A0A0G2JKZ1	TAPBP	Up	24.3174	24.7883	24.7567	27.2788	27.654	27.5201	7.27763	0.000107149
A0A2R8YFH5	SEC23B	Up	26.0384	25.7603	25.7706	28.1253	28.1015	27.7907	4.43634	0.000108303
A0A2R8Y6J3	RPL5	Up	27.7548	27.6629	27.6407	29.024	29.0462	28.8075	2.4169	0.000109218
Q5SRE5	NUP188	Up	23.1098	22.967	23.1096	24.5469	24.2905	24.3866	2.54181	0.000109575
C9JA28	SSR3	Up	23.8514	23.4491	23.2886	26.5946	26.2706	26.4657	7.53678	0.000110078
F5H0W7	NUP85	Up	23.4012	23.2489	23.4589	25.1715	25.1206	25.4659	3.68848	0.000111492
A0A2R8YEA7	ACTB	Up	23.8065	23.4291	22.9479	27.5447	28.0406	27.6715	20.5037	0.000113629
P52788	SMS	Up	25.3002	25.1199	25.168	26.5692	26.4153	26.3555	2.37948	0.000115111
Q96A65	EXOC4	Up	24.3921	24.4383	24.7287	26.3857	26.4112	26.2193	3.52853	0.000115237
O95782	AP2A1	Up	27.3497	27.5191	27.7201	29.1577	29.1503	29.1148	3.05533	0.000116977
P03891	MT-ND2	Up	22.6525	22.816	22.7121	24.6216	24.2881	24.6111	3.43454	0.000118008
F5H1S8	MLEC	Up	25.8489	25.8818	26.0347	27.2302	27.0631	27.0583	2.29015	0.000119451
Q15020	SART3	Up	26.7116	26.535	26.6116	27.651	27.7814	27.8467	2.20427	0.00012078
Q08211	DHX9	Up	29.8107	29.6204	29.7787	30.6969	30.7607	30.8239	2.03336	0.000122367
P49756	RBM25	Up	25.5896	25.5927	25.8217	26.814	26.8853	26.9003	2.29504	0.000123504
A0A1B0GWA2	AGPS	Up	24.4649	24.5192	24.6689	26.2518	26.4845	26.1401	3.34305	0.000124281
P52888	THOP1	Up	24.7863	24.6885	24.8516	26.0529	25.8444	26.0347	2.30032	0.000124846
C9J3L8	SSR1	Up	26.5062	26.1791	26.0934	28.4825	28.5767	28.2995	4.57365	0.000126568
P27701	CD82	Up	21.3008	21.0148	20.9119	23.0673	23.0742	22.8777	3.81198	0.000130906
P61158	ACTR3	Up	29.839	29.789	29.6855	30.7715	30.9064	30.985	2.16813	0.000131493
P62244	RPS15A	Up	28.098	27.7682	27.7325	30.0641	29.784	29.9073	4.14751	0.000132436
P50583	NUDT2	Up	25.4308	25.4191	25.1394	26.805	26.9829	26.8943	2.95745	0.000133168
Q8TCJ2	STT3B	Up	26.6814	26.881	26.6499	28.3675	28.6459	28.7124	3.57477	0.000136934
P49321	NASP	Up	26.5226	26.206	26.2132	27.8127	27.9241	27.9044	2.96167	0.000140471
Q9Y2X3	NOP58	Up	26.5789	26.5201	26.4157	27.5388	27.7506	27.5972	2.17944	0.000142773
A0A3B3IUC0	ITM2B	Up	23.3148	23.3321	23.1819	24.718	24.4516	24.6694	2.52579	0.000146091
P34932	HSPA4	Up	28.6969	28.4082	28.59	29.7523	29.8092	29.7708	2.31729	0.000146369
Q07812	BAX	Up	25.3765	25.7786	25.7522	27.4409	27.4937	27.441	3.53753	0.000154943
P28838	LAP3	Up	28.9795	28.752	28.9107	29.906	30.0539	30.017	2.16078	0.000161176
Q10589	BST2	Up	25.259	25.1534	25.0925	27.014	27.342	27.5156	4.35364	0.000164415
P0DOY3	IGLC3	Up	30.5529	30.3255	30.329	31.4827	31.6247	31.6099	2.25009	0.000182347
A0A2R8YD50	HSD17B4	Up	28.6609	28.4611	28.4379	29.6331	29.5181	29.5525	2.06754	0.000182442
O14880	MGST3	Up	24.8663	24.4514	25.0388	27.1125	27.1639	27.0923	5.05384	0.000184276
H0Y950	CD38	up	21.7135	20.8775	20.3749	27.1069	26.4703	26.6743	54.262	0.000184658
H3BMP9	RHOT2	Up	21.8971	21.4528	21.7943	24.1025	24.393	23.9678	5.4252	0.000186137
P19474	TRIM21	Up	23.4668	23.6321	23.5945	24.9367	24.922	24.681	2.43198	0.000187822
P84077	ARF1	Up	30.1758	29.9732	29.91	31.4411	31.3506	31.604	2.72375	0.00018815
P19623	SRM	Up	25.7917	25.7106	25.8491	27.0025	27.3382	27.21	2.63865	0.000188227
Q7KZF4	SND1	Up	28.047	28.2207	28.1912	29.5857	29.6796	29.3722	2.62603	0.000190786
Q08J23	NSUN2	Up	24.6203	24.5383	24.3691	25.9829	26.3075	26.0627	3.04926	0.000194223
P41091	EIF2S3	Up	26.4271	26.2816	26.2408	27.9573	28.1488	27.7622	3.11588	0.000195618
Q9UH62	ARMCX3	Up	23.6223	23.8197	23.5517	25.3458	25.7207	25.4211	3.55864	0.000196102
Q9NZM1	MYOF	Up	27.6572	27.4575	27.4061	28.697	28.6517	28.5608	2.18794	0.000197965
A0A0D9SFK2	MYO18A	Up	23.8421	24.2962	23.9541	25.7959	25.8792	25.8802	3.53308	0.000198317
K7EM38	ACTG1	Up	24.7301	24.815	24.8579	25.9317	25.9597	26.2044	2.34719	0.000199677
A2ACR0	PSMB9	Up	25.6937	25.92	26.1738	27.7877	27.8546	27.7332	3.63685	0.000200684
Q9H832	UBE2Z	Up	21.8649	21.1795	21.6669	24.7627	25.0509	24.5637	9.33078	0.000202338
Q5JP53	TUBB	Up	29.9728	29.894	30.2291	31.4606	31.6518	31.5108	2.84632	0.000202872
C9JFE4	GPS1	Up	26.0407	26.1069	26.3951	27.6518	27.5806	27.6141	2.70312	0.00020454
E9PH82	FAM98A	Up	21.1073	20.8902	21.7743	24.9353	24.7086	24.9848	12.2864	0.000204606
G3V2E7	KLC1	Up	25.086	25.0762	25.2833	26.2262	26.1011	26.1268	2.00396	0.00020562
P54136	RARS1	Up	27.3033	27.3553	27.2869	28.2078	28.3303	28.4742	2.03106	0.000212958
P78310	CXADR	Up	25.7447	25.7376	25.9904	27.3648	27.6329	27.7286	3.3664	0.000215831
A0AVT1	UBA6	Up	26.767	27.0582	27.0369	28.679	28.864	28.5238	3.32861	0.000216649
E9PD68	CRMP1	Up	21.1963	21.9725	21.0333	26.0926	25.6136	25.5087	20.2188	0.000219895
Q13155	AIMP2	Up	25.8565	25.8489	25.5446	27.2755	27.3776	27.1647	2.87313	0.00022011
Q8NI27	THOC2	Up	23.5847	23.5292	23.208	25.2197	25.452	25.5634	3.92067	0.000220566
Q86SF2	GALNT7	Up	23.263	23.6908	23.7456	25.588	25.6781	25.8274	4.38123	0.000221154
O75663	TIPRL	Up	22.0397	21.1298	21.2468	25.8018	26.5168	25.9069	24.3029	0.000221368
Q659C4	LARP1B	Up	21.6645	21.2882	21.8215	23.9334	24.2638	23.9215	5.4572	0.000226751
Q5JVZ8	ELMO2	Up	21.5647	20.6308	21.1255	24.5902	24.4685	24.6388	10.9956	0.000228233
Q9NP61	ARFGAP3	Up	24.2856	24.3592	24.2318	25.5298	25.3222	25.6236	2.29686	0.000239963
A0A1W2PQD2	ATXN10	Up	24.2373	24.0591	24.0803	25.4793	25.307	25.2089	2.30722	0.000240263
Q9UNS2	COPS3	Up	24.8116	24.4352	24.789	26.2455	26.1758	26.2295	2.90456	0.000240387
R4GMT0	ACTR1A	Up	25.5198	25.4099	25.295	26.7859	26.6581	26.5207	2.37297	0.000241709
Q96ST2	IWS1	Up	22.8369	22.5291	22.3978	24.3561	24.3584	24.2118	3.29625	0.00024374
P02792	FTL	Up	25.2654	25.3701	25.4076	26.6134	26.7099	26.4048	2.34303	0.000248095
Q9H1C4	UNC93B1	Up	22.2018	22.4713	22.3368	24.7331	24.213	24.6419	4.5716	0.000250801
K7EKE6	LONP1	Up	27.0091	27.1451	27.1275	28.0903	28.3683	28.1894	2.1766	0.000258118
P31146	CORO1A	Up	27.6265	27.358	27.6672	28.839	28.7404	28.7676	2.3486	0.00026294
A6NJA2	USP14	Up	26.1101	25.9781	26.0255	26.978	27.2253	27.2255	2.15103	0.000264492
Q9BSJ8	ESYT1	Up	28.6275	28.4573	28.6959	29.6232	29.6544	29.5135	2.00479	0.000265922
P07195	LDHB	Up	31.2551	31.0879	31.3562	32.3516	32.23	32.2569	2.06543	0.000267493
G3V1J9	TMED3	Up	23.8331	23.682	23.7825	25.3911	25.1764	25.0077	2.68688	0.000282569
J3QL14	ATP6V0D1	Up	23.9988	23.5586	23.2943	26.051	26.0547	26.1432	5.52416	0.00028807
P01861	IGHG4	Up	26.5176	26.4346	26.7772	28.198	27.9863	27.989	2.79199	0.000288108
P67775	PPP2CA	Up	27.1446	27.0579	26.9686	28.037	28.1859	28.3129	2.1758	0.000289257
A0A087WWJ1	MSH6	Up	22.3576	21.8765	21.9873	24.8385	24.4649	24.337	5.55197	0.000293368
P60228	EIF3E	Up	26.1266	26.4055	26.0223	27.83	27.6543	27.6467	2.87892	0.000293707
A0A087WXM6	RPL17	Up	28.0516	27.9379	27.7804	28.9979	29.2119	29.1602	2.29743	0.000295266
F5GWH5	TMEM258	Up	23.8017	24.1697	24.1202	25.6592	25.9925	25.78	3.4343	0.000295905
O43242	PSMD3	Up	27.2576	27.4293	27.1572	28.4004	28.3363	28.525	2.20259	0.000298734
O95486	SEC24A	Up	23.9907	23.8269	23.9548	25.5904	25.891	25.4233	3.27339	0.000300064
A0A0B4J2A0	#NA	Up	21.3798	21.0207	20.7391	23.8011	23.4099	23.7594	6.10612	0.00030498
Q9Y4W6	AFG3L2	Up	24.862	24.6392	24.7018	25.9894	25.8605	25.7446	2.18938	0.000309497
O95202	LETM1	Up	23.1085	23.2624	23.5163	25.5417	25.3105	25.1024	4.06283	0.000312308
Q5T4S7	UBR4	Up	25.0326	24.6806	24.8335	26.5243	26.2605	26.5465	3.02066	0.000312977
Q5T8U5	SURF4	Up	26.5633	26.281	26.7729	28.2639	28.356	28.5021	3.5676	0.000317963
P20592	MX2	Up	21.9899	21.8278	22.1308	24.026	23.8385	23.5707	3.55263	0.000322015
Q8TEX9	IPO4	Up	21.9419	21.6791	21.4253	23.9814	24.2678	24.5663	6.01993	0.000327008
P08243	ASNS	Up	22.2917	21.7882	22.5406	24.8248	24.9529	25.1755	6.857	0.000338858
A0A087WU65	VPS45	Up	24.3431	24.5359	24.5223	25.5921	25.6771	25.8979	2.38707	0.000339876
Q3ZCM7	TUBB8	Up	27.2879	26.96	26.8368	28.8373	29.2087	29.1878	4.14021	0.000344113
Q14008	CKAP5	Up	24.4296	24.2891	24.1871	25.6592	25.4873	25.8215	2.55634	0.000344382
P52735	VAV2	Up	22.8226	22.5836	22.7078	24.8143	25.0969	25.5155	5.41742	0.000345428
P07711	CTSL	Up	24.5791	24.6149	24.8067	25.8708	25.7006	25.6623	2.11063	0.000350005
C9J1Z8	ARF5	Up	23.1758	23.5806	23.6745	25.2513	25.4976	25.4463	3.78793	0.00035249
Q9UBG0	MRC2	Up	23.5271	23.6801	23.9614	25.4582	25.5146	25.2545	3.2182	0.000353958
D3DSM0	ITGB2	Up	22.0389	21.5491	22.1037	24.7237	25.4842	25.3692	9.81589	0.000362685
O96011	PEX11B	Up	23.3426	22.9057	22.8435	25.2968	25.7658	25.3289	5.40106	0.000366967
E9PM12	TCIRG1	Up	22.8087	22.3224	23.1277	25.6915	25.416	25.4749	6.84252	0.000367195
A0A0A6YYA0	TMED7-TICAM2	Up	28.2015	28.1245	28.4592	29.4728	29.3843	29.4143	2.23768	0.000372102
P01889	HLA-B	Up	26.2644	26.581	26.6881	29.1177	28.7159	28.5751	4.8964	0.000374211
Q10713	PMPCA	Up	25.6263	25.7812	25.7366	26.9403	27.1905	26.8353	2.41831	0.000377104
P19021	PAM	Up	22.8976	22.541	22.2141	24.7141	24.8021	24.8957	4.76713	0.00038369
P35270	SPR	Up	26.5823	26.2846	26.3061	27.4933	27.6254	27.5098	2.22197	0.000384716
Q6NXR6	SETD3	Up	23.4507	23.0586	23.458	25.1327	24.921	24.9053	3.16874	0.000385002
P00403	MT-CO2	Up	27.9659	27.8777	27.9663	29.0365	29.0447	28.7779	2.02284	0.00038829
Q9NPQ8	RIC8A	Up	23.9974	24.0628	24.3566	25.4085	25.4048	25.5445	2.48567	0.000390991
Q5JRX3	PITRM1	Up	26.4002	26.461	26.0607	27.6601	27.7659	27.7148	2.65056	0.000392587
P09914	IFIT1	Up	22.864	22.1281	23.6012	27.8252	27.4337	27.6722	27.4602	0.000408622
P20042	EIF2S2	Up	23.1502	23.4779	23.4492	24.569	24.4825	24.5788	2.27259	0.000409385
A0A3B3IU79	ITGA2B	Up	23.6761	23.9643	23.8768	25.4976	25.1845	25.1857	2.73247	0.000421421
Q9HAV4	XPO5	Up	22.8732	22.3862	22.9035	24.5657	24.5518	24.4955	3.52278	0.000424446
Q9Y6K5	OAS3	Up	22.1808	22.7664	23.9926	28.7194	28.7022	28.7351	53.4067	0.000424562
H0Y3V8	SGPL1	Up	22.6579	22.8935	23.3087	25.2117	25.118	24.9879	4.44587	0.00043094
P61326	MAGOH	Up	27.7524	27.8152	27.387	29.1377	29.0778	29.0687	2.71923	0.000436891
H0Y9V7	ATP2C1	Up	21.5582	21.5209	22.4315	25.2584	24.9646	25.2138	9.90906	0.000443386
P62269	RPS18	Up	27.8243	27.5218	27.729	29.0183	28.7731	28.9258	2.31989	0.000446409
Q9NUQ9	FAM49B	Up	25.3457	24.8601	25.1789	27.7244	27.1594	27.6054	5.16298	0.000447345
Q96TA1	NIBAN2	Up	27.058	26.9576	27.1644	28.262	28.0011	28.2614	2.16576	0.000452097
P61626	LYZ	Up	26.7473	26.3213	26.5889	28.1211	28.4453	28.4897	3.48107	0.000452202
D6RC71	STX18	Up	22.6701	22.9076	22.9678	24.7329	24.3484	24.3643	3.10241	0.000459085
D6R9B6	RPS3A	Up	20.9884	21.4107	21.2248	24.2419	24.3603	23.5804	7.22437	0.00046498
E9PCY5	TOP2B	Up	24.4574	25.0461	24.4352	26.893	26.7149	26.8979	4.56007	0.000468709
A0A3B3ITW3	ABCD3	Up	23.9362	23.2287	23.9549	26.2869	26.2761	26.5416	6.32736	0.000470698
E9PK47	PYGL	Up	26.4189	26.6983	26.4386	27.6218	27.492	27.5236	2.03809	0.000471014
P11678	EPX	Up	22.5496	22.7377	22.4229	24.7261	25.1494	25.5119	5.8934	0.000473111
P55058	PLTP	Up	22.6302	22.4721	23.0167	24.6372	24.4093	24.5494	3.54449	0.000475485
A0A1W2PPX5	SCARB2	Up	26.8082	26.7923	26.6791	27.7017	28.0314	27.9762	2.20877	0.00047958
P43490	NAMPT	Up	27.1144	27.1605	26.8677	28.0438	28.0407	28.1647	2.0499	0.000483563
P56192	MARS1	Up	26.2329	26.4975	26.4998	27.7086	27.6976	27.4719	2.32297	0.000491513
O75323	NIPSNAP2	Up	21.6912	20.7268	21.1238	24.6965	24.5005	24.182	9.70754	0.000495719
C9JZU8	PRKCD	Up	23.4269	23.1949	23.4406	24.8481	24.5086	24.6323	2.4775	0.000504265
Q92974	ARHGEF2	Up	23.8619	23.8508	24.096	25.6596	25.9761	25.4545	3.38808	0.000507615
E7EPB3	RPL14	Up	26.9675	27.0916	27.259	28.59	28.4064	28.258	2.48298	0.000508625
P41250	GARS1	Up	25.7159	25.1479	25.4373	27.1079	27.115	27.1964	3.26273	0.000510358
H3BP71	RNF40	Up	26.605	26.2604	26.7336	28.9407	28.8413	29.5061	5.90944	0.00051543
I3L1L3	MYBBP1A	Up	24.2034	24.2973	24.6207	25.945	25.7075	25.8702	2.76467	0.000530324
A0A140T9I0	HLA-A	Up	26.7475	26.4067	27.3915	29.8415	29.7322	29.802	7.6917	0.00053416
P08567	PLEK	Up	24.2671	23.7866	23.9317	25.7682	25.7629	25.5059	3.21291	0.000538943
Q03169	TNFAIP2	Up	22.6185	22.5277	22.3556	24.9588	24.3246	24.9469	4.73329	0.000551305
H3BTA2	PPP4C	Up	23.8559	24.2431	24.1228	25.3485	25.6212	25.4479	2.63653	0.000555357
Q9UIA9	XPO7	Up	25.6593	26.0327	25.8812	27.0138	26.9835	27.145	2.28108	0.000566367
A0A087X1D8	FDPS	Up	25.2106	25.1456	24.912	26.7796	27.3107	27.3593	4.17131	0.000568194
O95747	OXSR1	Up	25.4053	25.7405	25.6338	26.7433	26.8995	27.0383	2.46316	0.000569877
Q9P0I2	EMC3	Up	22.7453	22.3265	21.8294	24.9942	25.1997	25.4198	7.48581	0.000572918
C9JJQ5	RAB19	Up	24.3979	24.4162	24.6639	25.6207	25.4895	25.745	2.1821	0.000573344
G5EA36	CDC27	Up	23.9176	23.5443	23.7573	25.0606	25.3986	25.391	2.91538	0.000574692
O75915	ARL6IP5	Up	26.7903	26.5113	26.2242	29.0811	28.6673	28.5596	4.79228	0.000580546
F5H0D0	EIF2B1	Up	23.1725	23.2838	23.2452	24.1393	24.5041	24.3416	2.13538	0.00058189
P17655	CAPN2	Up	27.1433	27.4708	27.2794	28.3728	28.6423	28.5473	2.33431	0.000583633
Q6P179	ERAP2	Up	22.259	20.6852	22.4887	27.3806	27.413	27.4211	48.2991	0.000591808
O00232	PSMD12	Up	26.9476	26.7137	26.3332	28.5282	28.3915	28.4856	3.49095	0.000601305
O00182	LGALS9	Up	26.063	25.6886	26.1147	27.7356	27.4571	27.4562	3.01925	0.000616786
Q9H0U4	RAB1B	Up	27.2889	26.9345	26.9272	28.3223	28.2475	28.2053	2.31048	0.000624543
A0A0J9YY99	#NA	Up	25.3217	25.5752	25.7208	27.069	27.3933	27.5651	3.49001	0.000639293
Q86VP6	CAND1	Up	28.5975	28.5238	28.8275	29.8473	29.6731	29.6449	2.10258	0.00064809
P51571	SSR4	Up	27.6792	26.8326	27.556	29.9275	29.8979	29.8373	5.78242	0.000674507
P02786	TFRC	Up	26.0715	25.6351	25.3967	27.5784	27.757	27.6136	3.85996	0.000683742
E9PH64	NDUFB9	Up	25.4716	25.4494	25.1945	26.4832	26.6771	26.397	2.21493	0.000701551
P05161	ISG15	Up	26.227	26.4701	26.4881	27.7389	27.6303	27.4146	2.29662	0.000704664
A0A087X1B2	USP39	Up	22.7135	22.5251	22.5065	23.4848	23.7145	23.8028	2.12238	0.0007153
H0YLF3	B2M	Up	28.1346	28.1989	28.4503	29.5128	29.5147	29.2729	2.25359	0.000728843
C9JAB9	NCK1	Up	24.4568	24.0648	24.1607	25.5693	25.372	25.4322	2.34636	0.000729148
P28070	PSMB4	Up	26.3993	26.6767	26.2631	27.5659	27.582	27.5943	2.19523	0.000743635
P60953	CDC42	Up	27.9684	27.7604	27.9993	28.9804	29.1137	28.8151	2.08549	0.000753543
Q969V3	NCLN	Up	25.2462	24.7325	25.2711	26.8826	27.0391	26.741	3.49266	0.000766023
Q9NY33	DPP3	Up	26.4323	26.6698	26.152	27.7868	27.9862	27.9216	2.78981	0.000773409
P16435	POR	Up	24.6443	24.1955	24.148	25.7519	25.871	25.8418	2.81342	0.000774178
M0R0P7	RPL18A	Up	26.2948	26.2715	25.9085	27.3698	27.5874	27.6371	2.59039	0.000782103
O14976	GAK	Up	22.0159	22.5962	21.3762	25.1616	25.3609	25.2239	9.53168	0.000806663
P61026	RAB10	Up	27.3379	27.3494	27.081	28.8213	28.8734	28.4472	2.74697	0.000810431
P32321	DCTD	Up	21.8831	21.9576	22.5263	24.031	24.4054	24.1878	4.24481	0.000824113
Q9Y617	PSAT1	Up	25.2149	25.9946	25.2473	27.8869	27.7659	27.7906	5.02403	0.00082594
A8MTY9	VPS26C	Up	23.0808	22.9644	23.3077	24.7583	24.3708	24.4442	2.65142	0.000833968
O94826	TOMM70	Up	25.2986	25.7483	25.3886	26.7119	26.8258	26.7318	2.42505	0.000839062
A0A0G2JQD0	LSS	Up	22.8527	23.0855	22.8026	24.406	24.0792	24.0665	2.41211	0.000845552
P20020	ATP2B1	Up	21.303	20.6607	21.6396	25.0769	25.1496	24.2572	12.353	0.000863197
Q9NVJ2	ARL8B	Up	25.3058	25.4459	24.9961	27.222	26.8994	27.5023	3.88699	0.000865735
F5GZF0	CDK2AP1	Up	21.1193	21.2659	21.6649	23.0629	23.0791	22.8202	3.11102	0.000867726
D6R9I9	ABCE1	Up	24.0699	24.7148	24.4946	26.2039	26.2709	26.081	3.38425	0.000874727
P25205	MCM3	Up	25.2406	25.0676	24.6767	26.5346	26.5258	26.7331	3.03746	0.000878633
P49913	CAMP	Up	22.7284	22.5588	22.2415	24.3669	24.4111	23.9745	3.3432	0.000940896
E9PGT3	RPS6KA1	Up	24.2105	23.8807	23.9154	25.0649	25.2214	25.3868	2.33294	0.000947379
Q93009	USP7	Up	26.3528	26.6046	26.4553	27.7284	27.8573	27.4565	2.31311	0.000957469
P08246	ELANE	Up	23.5462	24.1162	23.8144	25.6973	25.3484	25.4775	3.20903	0.000965746
P51153	RAB13	Up	24.1511	24.2215	24.3784	25.5863	25.1967	25.4942	2.25853	0.000969141
A0A087X028	OGFR	Up	22.216	22.5516	21.2584	25.334	25.4162	25.3828	10.3318	0.000970073
Q6P4A8	PLBD1	Up	24.2376	25.0255	24.8829	26.8191	26.7789	26.8904	4.32934	0.000984926
P08579	SNRPB2	Up	23.6773	24.1779	23.6226	25.3973	25.4419	25.3142	2.94558	0.000991582
H0YI50	ERGIC2	Up	21.9205	21.6895	22.0849	23.2956	23.1238	23.536	2.6761	0.0010168
Q5TB53	TM9SF3	Up	24.7048	24.4451	24.5572	25.7562	25.7648	25.4526	2.12699	0.00102491
C9JHJ5	GOLGA4	Up	21.5624	20.7005	21.7768	24.1478	24.1989	24.1401	7.04061	0.00102861
Q8IXB1	DNAJC10	Up	24.5301	24.0567	24.2759	25.7116	25.8827	25.5497	2.68903	0.00103392
P40429	RPL13A	Up	25.9332	25.7573	25.7606	27.0427	26.9815	26.6775	2.11924	0.00103563
H7C5R8	PARP14	Up	22.0397	21.7126	21.9149	23.8196	24.1148	23.4201	3.72121	0.00104521
Q8WXH0	SYNE2	Up	25.73	25.624	26.0611	26.9984	26.892	27.0015	2.23298	0.00105391
H0YNG3	SEC11A	Up	25.778	25.7001	26.1947	27.1671	27.2528	27.3276	2.56365	0.0010657
C9J0H3	PLSCR1	Up	21.744	21.6233	21.9056	22.8444	23.006	23.286	2.44165	0.00108372
O00148	DDX39A	Up	21.2595	22.3029	20.9746	26.223	25.2102	25.7076	18.3954	0.00108549
P23497	SP100	Up	23.4631	23.4675	23.4451	24.4327	24.3478	24.7583	2.07685	0.00109163
O15269	SPTLC1	Up	21.7725	21.2395	22.5526	25.0173	25.3122	25.0664	9.69394	0.00112022
Q8WX92	NELFB	Up	24.0813	23.8945	23.4653	25.6332	25.3407	25.5103	3.20655	0.00112039
O95786	DDX58	Up	23.6204	24.0814	22.9846	26.3173	26.8564	26.996	8.94502	0.00113354
E7ETN8	GBP5	Up	21.8233	21.5603	20.9418	23.7948	24.1581	23.7217	5.46308	0.0011345
Q96KR1	ZFR	Up	20.9061	21.5772	20.7295	23.5844	24.3213	23.7845	7.09013	0.00113517
Q9BVK6	TMED9	Up	25.3848	26.2024	26.082	28.0263	27.9919	28.2126	4.55423	0.00115741
P33176	KIF5B	Up	25.4037	25.5513	25.79	26.544	26.7688	26.6316	2.09428	0.00120906
A0A3B3IS62	ALG6	Up	20.4883	21.027	21.7845	24.1998	24.3645	24.7243	10.0537	0.00121135
F8VUJ3	POC1B-GALNT4	Up	21.9585	21.336	23.0229	26.0735	26.1628	26.1886	16.4024	0.00121959
Q5T6H7	XPNPEP1	Up	25.8276	25.4956	25.4754	26.94	26.7501	27.1678	2.55464	0.00123793
O95834	EML2	Up	25.9908	25.7635	26.0612	26.9808	27.3739	27.0774	2.30628	0.00125282
Q14258	TRIM25	Up	26.2616	26.922	26.4784	28.0878	28.1697	28.2049	3.03181	0.00125952
P01911	HLA-DRB1	Up	24.9868	25.2651	25.8225	27.7219	27.6283	27.3316	4.60279	0.00127145
F5GYN4	OTUB1	Up	28.0764	27.6804	28.2818	29.4136	29.4459	29.4952	2.7107	0.00127522
Q8TEM1	NUP210	Up	24.1761	24.815	24.3883	26.0243	25.9546	25.9734	2.87646	0.00128376
A0A3B3IU16	BET1	Up	24.5106	23.6222	23.9561	26.0714	26.3371	26.2033	4.5137	0.00129474
Q9NV70	EXOC1	Up	21.5773	21.1067	22.0495	23.7373	23.7636	23.7976	4.55773	0.0013091
Q6PCE3	PGM2L1	Up	24.457	24.7828	23.503	27.4811	27.2422	27.6065	9.16197	0.00131304
H7C1K6	IFI44L	Up	20.7269	21.0197	22.1278	25.5406	25.1164	24.7734	14.4399	0.00131712
O00478	BTN3A3	Up	22.9514	22.6406	22.2337	24.8371	25.2068	24.5463	4.77288	0.00133182
E9PG35	MCCC1	Up	25.0618	25.0902	24.2998	27.1561	27.0904	26.8344	4.62573	0.00133564
F8W651	COPZ1	Up	24.6234	24.6189	24.1404	25.7433	26.0071	25.8781	2.66708	0.0013387
O00442	RTCA	Up	25.0372	24.8836	24.7463	26.5212	26.0016	26.4038	2.67548	0.00134913
A0A0B4J1W3	NAA15	Up	20.528	21.541	20.0394	24.3217	24.5946	24.1592	12.603	0.00135834
D6RHU3	CASP6	Up	26.1456	25.6391	26.1207	27.3631	27.5707	27.3153	2.72806	0.00136765
Q5VYK3	ECPAS	Up	22.3607	22.0985	21.5075	24.6103	24.133	24.1944	5.00594	0.0013775
H0YDJ3	PRPF4B	Up	24.0039	24.1332	23.8712	25.2893	24.9234	25.3235	2.25943	0.00138412
A0A2R8YFH0	MSH2	Up	21.5162	21.7343	22.0245	24.1612	23.901	23.4154	4.19166	0.00142467
D6RDG3	BTF3	Up	25.7071	25.989	25.5683	26.9817	26.9509	26.7414	2.19851	0.00143028
O43172	PRPF4	Up	24.5556	24.9258	25.022	25.9538	25.9275	26.0495	2.20761	0.00147574
O75844	ZMPSTE24	Up	24.2233	23.8275	24.9044	26.806	26.6998	26.8925	5.58288	0.00148
Q14244	MAP7	Up	21.312	20.8666	21.4774	22.7286	22.9863	22.6957	2.99985	0.00148608
P46977	STT3A	Up	26.2143	26.6402	26.0503	27.6299	27.7462	27.8385	2.70679	0.00150825
Q12797	ASPH	Up	26.6603	26.2348	26.6319	27.5743	27.5916	27.7408	2.18335	0.00156467
Q13895	BYSL	Up	22.6191	22.7597	22.2511	23.979	24.5169	24.522	3.47255	0.00158654
A0A0G2JNZ2	SCRIB	Up	23.7323	23.3961	23.8991	24.9844	25.3595	25.0166	2.72135	0.00162326
G8JLH9	STAT3	Up	25.3496	25.7561	25.8177	27.1266	27.0061	26.7898	2.51937	0.00165889
A0A087WVC4	PRKACB	Up	25.8963	25.3059	25.5413	26.9666	26.8272	26.9638	2.52815	0.00166383
Q9P265	DIP2B	Up	21.8257	22.145	22.113	22.9216	23.2734	23.156	2.12739	0.00167711
K7EIU8	SMAD4	Up	21.5746	21.271	22.2034	23.7355	23.7386	23.7572	4.17209	0.00168797
Q8WUM0	NUP133	Up	21.8509	22.7423	23.1799	25.9419	25.6352	25.4878	8.55793	0.00169607
O14966	RAB29	Up	23.1169	23.3982	23.0827	24.451	24.476	24.9509	2.6883	0.00171265
A0A3B3ISG5	IDE	Up	24.1529	24.091	24.6	25.7677	25.4773	25.6739	2.56393	0.00171393
P00533	EGFR	Up	24.6941	24.4471	24.2478	25.5829	25.4042	25.5107	2.05082	0.00173637
Q10472	GALNT1	Up	20.8837	21.7482	22.0845	24.1521	24.6218	24.5028	7.22735	0.00175845
P63172	DYNLT1	Up	20.7438	21.8553	22.0302	25.0335	24.5605	24.6032	9.12166	0.00176669
B1AK20	DNAJC11	Up	21.4796	21.3807	22.284	24.1242	23.8359	23.8605	4.67655	0.00177474
Q8IXQ6	PARP9	Up	19.7852	21.621	21.5491	25.5911	25.962	25.3285	24.9695	0.00178411
P98088	MUC5AC	Up	26.7002	27.5107	27.2595	28.9177	28.9093	28.9624	3.41763	0.00179387
J3KPF0	HECTD4	Up	21.319	22.4533	21.9424	24.517	24.4743	25.0472	6.84278	0.00180143
Q71DI3	HIST2H3A	Up	21.2187	22.2493	20.6047	25.769	25.0498	26.1975	19.8981	0.00180209
Q96AY3	FKBP10	Up	24.8247	24.6097	24.7783	26.0545	25.7697	25.6095	2.10481	0.00180263
Q9Y3P9	RABGAP1	Up	21.624	21.5621	20.2629	24.3069	24.5214	24.5234	9.85523	0.00183099
B4DZG7	ARL1	Up	25.9776	25.1651	25.2933	27.2619	27.5163	27.5376	3.89041	0.00184113
Q6IA86	ELP2	Up	24.0543	23.0925	23.2355	25.8572	25.8384	25.5677	4.90298	0.00186539
Q13257	MAD2L1	Up	21.8963	22.0216	21.0322	23.8967	23.9189	24.1089	5.01009	0.00186747
Q969X5	ERGIC1	Up	26.5214	26.2393	26.7115	27.6944	27.6808	28.0417	2.48789	0.00190628
D6REB4	PAIP1	Up	25.8985	25.4461	25.9118	26.9038	26.9166	27.1291	2.34734	0.00191271
Q5VXN0	RPF2	Up	23.0197	22.8715	22.8064	24.6095	24.8148	24.0997	3.04991	0.00191667
H0Y543	MAN1A2	Up	21.5704	22.3281	22.5126	24.4346	24.6553	24.2039	4.90493	0.00191982
Q9HD20	ATP13A1	Up	23.5879	24.1922	23.8396	25.2045	25.1053	25.1663	2.43754	0.00193388
P29728	OAS2	Up	20.6149	21.6159	23.115	27.5166	27.0592	26.9649	42.1755	0.00193693
Q8IUI8	CRLF3	Up	21.3713	20.7684	21.074	22.3725	22.6811	22.7947	2.91785	0.00198548
E9PKP7	UBTF	Up	24.8506	25.2834	25.2081	26.3336	26.102	26.4125	2.24809	0.00199443
F8VR50	ARPC3	Up	26.8728	26.7586	26.3788	27.7657	27.8747	28.058	2.34466	0.00202414
P12532	CKMT1A	Up	25.5701	25.9838	25.8417	26.7954	27.0343	27.2095	2.32066	0.00206109
A0A494C0U1	TPP2	Up	25.8173	26.1182	26.0578	26.8617	27.0145	27.2572	2.06577	0.00207362
O15498	YKT6	Up	25.8094	25.3987	25.5748	26.7676	27.0058	26.5951	2.28979	0.00207734
D6RA48	MGAT1	Up	22.4174	22.1329	22.6504	23.796	23.5234	23.9172	2.54081	0.00208341
Q15628	TRADD	Up	22.1168	22.5779	21.5691	24.2752	24.0837	24.4041	4.48908	0.00210237
C9JD84	LTBP1	Up	21.3798	21.4164	20.3109	23.6327	23.7066	23.5234	6.00098	0.00212872
P22033	MMUT	Up	25.1243	25.2901	24.7245	26.2717	26.4067	26.6244	2.61697	0.00213247
B3KXD6	PES1	Up	23.3406	22.6247	22.9419	24.4321	24.3963	24.4752	2.76163	0.00215282
P49257	LMAN1	Up	28.1011	27.9061	27.7696	28.7208	29.0567	29.0174	2.00831	0.00216074
P20292	ALOX5AP	Up	23.3543	22.2247	22.0748	25.4392	25.3628	25.3396	7.1072	0.00220854
Q9Y5M8	SRPRB	Up	23.4183	23.3189	22.1955	25.7314	25.6114	25.7271	6.55412	0.00233468
Q7L2H7	EIF3M	Up	25.8868	26.7093	25.9792	28.3069	27.9287	28.1589	3.83637	0.00235426
P25098	GRK2	Up	23.1035	23.3719	23.3608	24.484	24.6116	24.1426	2.19468	0.00235813
C9JUM8	IFI44	Up	22.5989	21.9367	21.0172	25.3376	25.1665	24.8734	9.67911	0.00237985
Q9BRR6	ADPGK	Up	24.2293	23.7657	23.7089	25.0808	25.335	25.0862	2.40501	0.00238132
Q96PP9	GBP4	Up	21.5949	22.4678	20.8477	25.1414	24.7047	25.231	10.4749	0.00239279
P18031	PTPN1	Up	23.2261	24.191	22.5965	26.3702	26.7704	26.7992	9.90914	0.00239348
P05362	ICAM1	Up	23.2312	22.3434	22.9663	24.9431	25.2552	24.691	4.33529	0.0023974
A0A3B3IS71	RB1	Up	20.8617	21.5169	20.813	23.2389	22.8809	22.7005	3.67119	0.00246798
O00194	RAB27B	Up	23.2815	23.9943	23.818	25.3352	25.0837	25.297	2.90932	0.00250879
A0A0A0MTR7	RNF213	Up	24.8991	26.1033	24.6265	28.2115	28.2906	28.2436	8.21891	0.00259687
Q9UBV2	SEL1L	Up	24.7023	24.334	24.5933	26.9197	26.0626	26.9792	4.31883	0.00260028
Q8N3C0	ASCC3	Up	20.8927	21.8283	21.8518	23.9624	24.118	23.5831	5.14631	0.00260336
P42566	EPS15	Up	20.8335	21.9725	21.3622	24.1337	23.5797	24.255	6.06319	0.00261057
Q12996	CSTF3	Up	23.8221	23.2989	23.1295	25.4175	24.8976	25.4577	3.58192	0.00261376
U3KQ83	CSNK1A1	Up	21.3455	20.8708	22.0265	23.6111	23.9321	23.676	5.01227	0.00264673
Q9BQA9	CYBC1	Up	24.1567	24.647	24.4153	26.0773	26.2084	25.5964	2.9371	0.00265827
Q9UJW0	DCTN4	Up	22.3824	21.6924	22.2453	23.6117	24.2074	24.1971	3.72874	0.0027601
E5RGY0	DERL1	Up	23.1546	23.5191	22.6813	24.7841	25.1313	25.4087	3.97164	0.00276284
F8WBE2	CYP20A1	Up	22.5999	22.1325	22.0594	23.5104	23.3255	23.4853	2.26023	0.00276903
C9J8T0	EEFSEC	Up	23.8757	24.0201	23.7774	24.9016	25.1405	24.6662	2.01635	0.00277802
C9J4M6	POLR2B	Up	24.2654	23.8883	24.0424	24.9861	25.4054	25.465	2.32963	0.00280807
J3QQS9	SLC16A3	Up	20.9301	22.0227	21.228	23.626	23.4315	23.7089	4.5795	0.00284522
A5YKK6	CNOT1	Up	24.5949	24.5505	24.0202	25.7665	25.5399	25.6568	2.40473	0.00295062
E9PB90	HK2	Up	21.5225	20.7778	22.424	24.6989	24.8819	24.5397	8.76701	0.00298489
A0A3B3ITS3	DARS2	Up	22.0071	20.9892	22.2009	24.179	24.6215	24.1825	6.04316	0.00300425
H0YGV7	MAN1B1	Up	22.8597	23.8053	23.6237	25.5124	25.5919	25.2075	4.0214	0.0030175
Q9HD89	RETN	Up	20.984	22.3993	22.6143	25.3077	25.2064	25.3574	9.78979	0.00304035
B1AJY5	PSMD10	Up	24.1664	24.4901	23.8942	25.8917	25.7399	25.3709	2.79711	0.00304123
Q9NZL4	HSPBP1	Up	23.4353	23.0879	22.4698	24.7167	24.9331	24.949	3.65168	0.0030666
M0R0C3	TIMM50	Up	23.2859	22.5943	22.5101	24.4333	24.7952	24.4253	3.37416	0.0030701
Q58FG1	HSP90AA4P	Up	20.9229	23.0672	23.1793	27.3364	27.1766	26.9059	26.9051	0.00310213
Q9UBX3	SLC25A10	Up	23.3026	22.9192	23.4593	24.2224	24.2933	24.2534	2.04107	0.00312354
P42574	CASP3	Up	24.1308	24.6411	24.0133	25.5384	25.6192	25.4369	2.41117	0.00314133
O75635	SERPINB7	Up	22.2182	20.6295	22.0882	24.8432	24.8749	25.3212	10.3232	0.00319067
Q86X76	NIT1	Up	25.024	24.5396	24.4727	25.9119	25.7467	25.7961	2.20297	0.00321944
Q5T093	RER1	Up	21.7414	21.4092	22.3712	23.68	23.6743	24.0926	3.93136	0.00327417
Q8TBQ9	TMEM167A	Up	24.4396	24.4155	23.6697	26.1563	25.8559	25.7664	3.36657	0.00328351
Q8TCT9	HM13	Up	22.7019	21.7017	21.0918	25.3778	25.2022	24.6388	9.45537	0.0033648
P16422	EPCAM	Up	24.7471	25.1304	25.0005	26.3592	26.9444	26.2218	2.92634	0.00337239
A0A2R8YE59	CERT1	Up	23.9951	23.9422	23.4021	25.8123	25.148	25.427	3.21018	0.00338495
A0A0J9YWR7	ARMC10	Up	22.0509	21.369	20.3733	24.5144	24.2819	24.2156	8.41461	0.00343721
O00160	MYO1F	Up	20.7715	22.3208	21.0583	24.3094	24.2484	24.5935	8.00117	0.00354073
Q7Z4Q2	HEATR3	Up	21.0022	20.787	21.7026	22.931	23.6833	23.638	4.76825	0.00361736
Q13618	CUL3	Up	22.6616	21.2882	22.2098	24.4259	24.6623	24.4944	5.55714	0.00380702
F8VVM2	SLC25A3	Up	23.0121	23.2113	21.7538	25.7113	25.3984	25.3514	7.10091	0.00384353
F8W9B8	EXOC5	Up	24.0205	23.7752	23.8002	24.6545	25.1989	24.8938	2.07109	0.00393748
Q8IV08	PLD3	Up	21.1621	21.3726	22.2201	23.4418	23.7117	23.9351	4.3207	0.00394497
P78347	GTF2I	Up	26.8176	26.6849	26.3909	27.5296	27.9374	28.0509	2.31041	0.00395429
O60256	PRPSAP2	Up	24.5667	24.5191	24.2512	25.7744	25.4963	25.2589	2.091	0.00396737
X6RM59	NT5C3A	Up	21.9124	22.184	20.9596	24.3014	24.6205	23.8436	5.93738	0.00408719
A0A0C4DH38	IGHV5-51	Up	25.3549	24.6865	26.2129	28.0519	28.0062	28.0215	6.09839	0.00412516
O95758	PTBP3	Up	24.8739	25.1146	24.5414	25.8344	25.9927	26.2056	2.24639	0.0041301
P41226	UBA7	Up	21.423	21.9075	22.9265	24.6428	24.9758	25.4341	7.63118	0.00418997
P11908	PRPS2	Up	25.3315	25.1726	25.5822	26.6449	26.2663	26.2515	2.03566	0.00427167
P55957	BID	Up	24.1984	24.1856	24.4778	25.7772	26.5256	25.6454	3.23894	0.00427977
O15438	ABCC3	Up	22.751	23.4287	23.2206	24.6154	24.3208	24.3371	2.447	0.00435735
A2RRP1	NBAS	Up	21.6878	21.4803	21.2683	22.5624	22.9265	22.3945	2.21759	0.0044094
Q7Z2Z2	EFL1	Up	23.3374	22.89	23.1261	23.9204	24.2057	24.3422	2.05375	0.0044186
P60059	SEC61G	Up	24.7541	24.385	24.2032	25.5241	25.9255	25.5284	2.31634	0.00445391
Q92621	NUP205	Up	23.7236	24.019	23.3636	25.0693	25.7294	25.1622	3.07002	0.00445947
F8VWL0	TFCP2	Up	21.4597	22.3455	21.9922	23.5769	24.4917	24.3102	4.57498	0.0044729
Q9P2X0	DPM3	Up	23.6607	23.9239	24.1465	24.839	25.3872	25.1795	2.3374	0.00451005
F6SKB8	NECAP2	Up	24.2105	24.612	23.9086	25.5643	25.7219	25.3698	2.47651	0.00455262
O95433	AHSA1	Up	25.3914	26.1765	26.0569	27.2979	27.2416	27.492	2.76815	0.00455292
Q5T4U8	RABGGTB	Up	22.5701	22.2965	21.4381	23.9676	24.442	24.2181	4.30994	0.00457717
Q9UHQ9	CYB5R1	Up	22.1688	20.5972	22.6832	25.7467	25.3559	25.355	12.7237	0.0046044
I3L4X8	ITGB3	Up	23.773	23.8444	24.3787	25.1002	25.0991	25.0775	2.13401	0.00462793
O14828	SCAMP3	Up	23.3106	23.3588	23.3696	24.1296	24.7932	24.4172	2.14408	0.00467709
G3V0H7	SLCO1B7	Up	23.0141	21.9103	22.4946	24.2969	24.2359	24.4703	3.63362	0.00467771
Q9H1C7	CYSTM1	Up	22.3593	21.5372	22.2693	23.8319	23.5744	24.2075	3.52102	0.00468649
O14879	IFIT3	Up	23.7385	21.9828	21.7387	26.1557	26.1038	25.9742	12.0524	0.00473993
Q5VU11	RPP30	Up	22.0277	20.7758	21.846	23.6913	23.9189	23.78	4.74648	0.00476536
Q16762	TST	Up	25.7524	25.827	25.3794	26.4794	26.9103	26.8486	2.13346	0.00479318
P45974	USP5	Up	27.388	27.4625	27.2655	28.7451	28.4493	28.1189	2.09327	0.00493758
Q8IV36	HID1	Up	23.8263	24.7569	24.9572	26.5374	26.3802	26.5835	3.96384	0.00494189
Q709C8	VPS13C	Up	26.2677	25.7285	26.2864	27.2194	27.0635	27.1792	2.08471	0.00494689
R4GNF2	COMMD3	Up	21.3931	21.5505	23.1128	25.031	25.2114	25.0852	8.51753	0.00497909
Q8WYJ6	SEPTIN1	Up	20.2602	20.8377	21.802	23.3464	23.6211	23.7725	6.11926	0.00499286
O95372	LYPLA2	Up	26.3026	26.1157	25.6973	27.1038	27.0411	27.0081	2.01737	0.00502524
Q92973	TNPO1	Up	25.557	25.6347	26.2763	27.4147	27.0164	27.3939	2.73651	0.00518961
A0A2R8YDT1	GLUL	Up	25.4751	25.461	25.5353	26.6622	27.4966	26.7393	2.781	0.00524989
H3BRE0	FBXO22	Up	23.4545	22.8891	23.5579	24.8633	24.4416	24.9861	2.75716	0.00527751
A0A0B4J1X8	IGHV3-43	Up	21.3542	22.2927	22.8186	24.3739	24.7547	24.6386	5.40354	0.0053432
Q53GQ0	HSD17B12	Up	26.4899	26.3622	27.0597	27.7966	27.8281	27.8134	2.25856	0.0054098
Q5JTH9	RRP12	Up	22.5759	22.1631	20.9238	24.4482	24.7126	24.888	6.94198	0.00549528
O15067	PFAS	Up	23.9123	23.2721	23.8512	24.8189	24.724	24.8708	2.18255	0.00568602
Q8N0U8	VKORC1L1	Up	22.888	22.4409	23.0429	23.8803	23.8743	24.2903	2.33654	0.00571746
S4R3P5	MMAB	Up	21.9914	22.1564	23.2192	24.4262	24.5633	24.6791	4.28872	0.0058301
A0A0A0MSK3	TBXAS1	Up	22.6058	21.2073	20.6686	25.2051	24.4379	24.7808	9.94534	0.0058519
S4R343	DNAJC17	Up	21.5877	21.6427	20.9189	22.7645	23.5636	23.0861	3.37511	0.00592689
Q9UIQ6	LNPEP	Up	20.7026	20.8903	20.2983	23.2498	23.1028	22.0748	4.52754	0.00596792
C9JDE9	ACAA1	Up	24.5047	23.7254	23.8866	25.5591	25.7926	25.2661	2.82919	0.00601505
Q8IZV5	RDH10	Up	23.6386	23.8436	22.2673	25.8639	25.8559	25.9201	6.19076	0.00604263
O95436	SLC34A2	Up	20.0287	21.8657	20.5906	23.8433	25.6667	25.4773	17.9683	0.00630242
P12724	RNASE3	Up	22.7781	22.423	21.5115	24.4313	24.1119	24.2814	4.10482	0.00631308
K7EIG1	CLUH	Up	22.9243	22.6925	22.104	24.3751	23.9363	23.9152	2.83218	0.00632928
P55265	ADAR	Up	24.0872	24.96	25.3335	26.6326	26.7751	26.9478	3.97666	0.00635661
P17813	ENG	Up	21.6563	22.8121	21.9319	24.4492	24.3873	23.8204	4.24419	0.00656505
A0A3B3IRK8	IFIH1	Up	21.0846	21.5915	22.185	23.2205	23.4653	23.8263	3.6901	0.00659232
Q9UGP8	SEC63	Up	22.4747	21.6618	20.8307	24.1136	24.1985	24.0456	5.51542	0.00665882
Q96JB2	COG3	Up	21.6611	21.9795	21.8053	23.2789	22.8299	22.6305	2.1403	0.00669242
Q9P2X3	IMPACT	Up	22.5185	21.8332	21.8631	23.6648	23.8822	23.2268	2.8673	0.00675517
Q7Z2W4	ZC3HAV1	Up	22.1526	23.8235	24.0036	26.4742	26.2092	26.8841	9.16367	0.00676546
A0A3B3ITR6	FARS2	Up	22.1645	22.3443	21.9359	23.574	23.0442	23.8311	2.52255	0.00682464
Q10471	GALNT2	Up	22.9067	21.1383	21.3095	24.7427	24.8045	24.5301	7.50393	0.0069423
P98095	FBLN2	Up	23.9376	23.731	22.8294	25.1652	25.2994	25.2778	3.3593	0.00698108
H0YDB0	GSDMD	Up	20.5897	22.0994	20.8361	26.1579	23.999	25.3778	16.0356	0.00699993
Q9NRF8	CTPS2	Up	22.9865	23.0376	22.0531	24.2296	24.3846	24.3907	3.12222	0.00715603
Q9NVM9	INTS13	Up	20.3086	21.0564	21.5126	22.8477	23.1743	23.87	5.05658	0.00721139
Q9UPN3	MACF1	Up	26.499	26.104	26.768	27.3776	27.5876	27.4553	2.02299	0.00736729
V9GY58	ELMOD2	Up	22.1487	20.9427	22.2786	23.8122	23.9623	24.0569	4.44999	0.00752052
Q9BS40	LXN	Up	26.7115	26.1102	26.8837	27.7064	27.7722	27.7491	2.25653	0.00753679
X6R674	IVNS1ABP	Up	21.5954	20.826	22.0143	23.5296	23.7432	24.7185	5.7301	0.00755645
A0A286YEW0	EMC1	Up	22.5689	21.5364	22.662	24.0876	24.6369	24.0341	3.99201	0.00813695
Q96HQ2	CDKN2AIPNL	Up	21.7908	21.5103	22.0597	23.7712	23.4501	22.825	2.95225	0.00814809
P09543	CNP	Up	24.0863	24.73	25.0355	26.4709	26.4036	25.8842	3.10719	0.00819867
Q9NP77	SSU72	Up	21.8684	22.909	21.7575	23.9358	24.0673	23.9141	3.46793	0.00833495
O95870	ABHD16A	Up	23.1787	21.6829	23.5103	25.6475	25.3497	25.702	6.84845	0.00835432
Q9H4B7	TUBB1	Up	22.1007	23.4495	22.6276	24.5113	24.7258	24.7494	3.82706	0.0083738
K9N2S2	IL15RA	Up	23.0854	20.5478	22.5981	25.657	26.0705	25.8846	13.8674	0.0085065
Q8NDH3	NPEPL1	Up	23.0443	21.4017	22.1577	24.4432	24.4555	24.9242	5.30155	0.00858933
Q99523	SORT1	Up	21.9228	22.0808	23.8773	25.5111	25.6009	25.8925	8.23193	0.00882654
Q14651	PLS1	Up	23.5851	23.4305	22.7189	24.7006	24.7375	24.4035	2.58295	0.00882837
P54709	ATP1B3	Up	23.8118	24.7758	24.5966	25.8843	25.6987	26.0045	2.76591	0.0089829
Q6P4E1	CASC4	Up	21.1968	19.7458	21.48	24.4499	23.5019	23.418	7.90284	0.00912011
P41212	ETV6	Up	20.6982	21.5757	20.8112	23.9012	22.6158	24.0008	5.56948	0.00913321
K7ENW7	DNMT1	Up	20.8598	21.3882	22.4672	24.4473	23.9042	23.7292	5.4839	0.00916519
P26196	DDX6	Up	24.9011	24.8514	24.2399	25.6038	25.7102	25.7438	2.03048	0.00921148
E5RFJ0	DOCK2	Up	21.0983	21.513	22.3362	23.8898	23.1969	23.8173	3.96004	0.00951018
Q8IWA4	MFN1	Up	19.8583	22.4776	20.2511	24.8546	25.0558	24.4015	15.0146	0.00957005
Q12888	TP53BP1	Up	22.2922	23.9557	21.4448	25.9879	25.8447	26.3135	11.1927	0.00970998
Q96P70	IPO9	Up	23.1865	22.7048	21.0321	25.4213	25.1801	25.5056	8.34679	0.0097505
A0A1W2PRG1	PIGT	Up	21.8796	22.2182	23.2213	25.0031	24.9581	24.1517	4.80526	0.00977536
O75976	CPD	Up	21.6266	22.1776	21.1054	23.0343	23.2201	23.6611	3.1791	0.00987349
Q29RF7	PDS5A	Up	23.6413	23.1482	23.5898	24.4364	24.2845	24.8509	2.09094	0.0099062
Q9P2I0	CPSF2	Up	21.545	21.1118	22.4791	23.5025	23.5644	23.8847	3.83322	0.00995001
A0A0A0MSS8	AKR1C3	Down	30.9106	30.9101	30.8844	28.4749	28.4545	28.4695	0.18487	2.1514e-09
Q05707	COL14A1	Down	31.721	31.7371	31.6681	29.3995	29.399	29.3986	0.201704	3.97793e-08
Q99584	S100A13	Down	29.0338	29.0854	29.0589	26.9562	26.9717	27.0116	0.23659	7.8371e-08
P17661	DES	Down	34.0315	34.0033	34.095	31.6561	31.6855	31.7077	0.194772	1.77628e-07
Q9NR12	PDLIM7	Down	30.2994	30.2967	30.3498	28.5515	28.5447	28.6006	0.297357	2.36561e-07
P39019	RPS19	Down	30.143	30.1981	30.1416	28.4115	28.3756	28.4317	0.296349	2.394e-07
Q15293	RCN1	Down	30.3156	30.3314	30.3167	29.2734	29.2437	29.2922	0.482475	2.49655e-07
Q15746	MYLK	Down	30.8748	30.8339	30.8435	29.4102	29.4066	29.3524	0.363237	3.32358e-07
P51884	LUM	Down	32.813	32.8906	32.9031	30.1492	30.0351	30.1038	0.146312	3.63078e-07
Q9BXN1	ASPN	Down	30.6754	30.6591	30.7226	27.3336	27.1592	27.2096	0.0914084	3.91317e-07
Q9H444	CHMP4B	Down	27.5866	27.5349	27.5424	26.2272	26.1774	26.2091	0.392276	4.03795e-07
E9PGF5	TNS1	Down	28.7385	28.7137	28.7308	27.0492	26.9734	26.961	0.300802	4.37954e-07
P15090	FABP4	Down	27.6715	27.8108	27.7356	24.4639	24.3445	24.4521	0.100192	4.63167e-07
A0A087X0S5	COL6A1	Down	30.6857	30.7387	30.7526	29.2886	29.2849	29.2456	0.365348	4.91836e-07
P21333	FLNA	Down	35.1587	35.0876	35.164	33.7471	33.7285	33.7188	0.377539	7.0343e-07
Q969H8	MYDGF	Down	29.1845	29.1416	29.1625	27.9269	27.9174	27.8625	0.417382	7.33769e-07
H0YGS3	MFAP5	Down	25.7133	25.6369	25.717	23.3209	23.2581	23.3852	0.193757	7.8274e-07
K7EMA7	RPL23A	Down	25.7075	25.7343	25.7414	22.8846	23.0186	23.0729	0.150136	1.12057e-06
P12110	COL6A2	Down	29.439	29.4625	29.4526	27.1391	27.0642	27.2349	0.202314	1.31123e-06
P62310	LSM3	Down	28.2712	28.1488	28.1455	25.7888	25.8392	25.7092	0.188224	1.75245e-06
Q5JXI8	FHL1	Down	29.9025	29.9037	29.9768	27.3509	27.4213	27.5356	0.177794	1.89957e-06
P01008	SERPINC1	Down	29.7351	29.6577	29.757	28.1746	28.209	28.1206	0.341848	2.55579e-06
Q96QR8	PURB	Down	25.3897	25.1958	25.3565	21.9748	21.7632	21.9276	0.0930745	2.56895e-06
E9PJL7	CRYAB	Down	30.6645	30.7954	30.6771	27.6591	27.4172	27.5346	0.110693	2.57141e-06
P60866	RPS20	Down	28.2522	28.3263	28.2328	25.649	25.7687	25.8509	0.175039	2.69901e-06
P62328	TMSB4X	Down	32.221	32.1372	32.0472	28.7679	28.6492	28.9157	0.0975649	3.3612e-06
P62861	FAU	Down	26.9313	26.8088	26.8957	21.5764	21.4475	21.0782	0.0219255	3.60924e-06
A0A3B3ISX9	TNXB	Down	30.5821	30.6196	30.662	27.2875	27.1943	26.9643	0.0900914	3.90753e-06
H7C2W9	RPL31	Down	27.1598	26.9899	27.0793	24.8808	24.7632	24.8996	0.213388	4.32556e-06
H0Y9Y3	SYNPO2	Down	28.3126	28.3887	28.3347	27.1443	27.0503	27.1255	0.423781	4.53076e-06
Q16853	AOC3	Down	28.1149	27.9589	28.1408	25.5238	25.42	25.5942	0.169713	4.66137e-06
P04080	CSTB	Down	33.837	33.9304	34.0153	30.6686	30.8905	30.6331	0.109056	4.77098e-06
P35749	MYH11	Down	34.5688	34.5968	34.626	33.2173	33.3318	33.225	0.395249	4.96948e-06
S4R371	FABP3	Down	28.9982	28.7801	28.8621	26.2217	26.3149	26.1365	0.158686	5.38347e-06
Q6NZI2	CAVIN1	Down	31.0209	31.1657	31.2056	29.3815	29.396	29.4157	0.300825	6.95065e-06
A2A2D0	STMN1	Down	27.8787	27.8388	27.9327	26.8657	26.8364	26.7867	0.481705	7.83795e-06
P30043	BLVRB	Down	30.4807	30.5275	30.5815	29.3691	29.2993	29.3933	0.442583	8.40108e-06
P00326	ADH1C	Down	31.5483	31.5495	31.5782	27.6078	27.1294	27.222	0.0529609	8.56642e-06
Q63ZY3	KANK2	Down	28.6882	28.5313	28.6204	27.0222	27.1241	27.0606	0.342864	9.08002e-06
P05546	SERPIND1	Down	26.7075	26.6531	26.6641	24.9982	25.0721	25.1822	0.332001	9.13755e-06
P51911	CNN1	Down	33.3043	33.4869	33.3929	31.1693	31.1759	30.9858	0.205277	9.68466e-06
O00391	QSOX1	Down	27.9791	28.0365	28.0756	25.8354	25.9893	26.069	0.238845	9.81713e-06
Q96RQ9	IL4I1	Down	29.3172	29.4543	29.3177	26.5966	26.8811	26.7024	0.160836	9.91502e-06
A0A0S2Z4G6	TPM1	Down	28.129	28.2116	28.3544	25.4719	25.3035	25.5616	0.144987	9.98038e-06
A0A087X1J7	GPX3	Down	28.7583	28.6553	28.5588	27.0282	27.0269	27.0578	0.325375	1.01027e-05
Q15124	PGM5	Down	30.0614	30.0484	30.073	27.7867	28.0219	27.782	0.218028	1.01965e-05
Q14315	FLNC	Down	29.85	29.7534	29.9251	27.8809	28.0239	28.013	0.273532	1.02103e-05
P62942	FKBP1A	Down	30.3248	30.3475	30.518	28.6289	28.6909	28.6595	0.29999	1.06606e-05
Q71UI9	H2AFV	Down	27.6693	27.7575	27.8263	25.6499	25.7032	25.8464	0.246926	1.08651e-05
O00625	PIR	Down	27.8682	27.8694	27.8661	24.7836	24.9699	24.5672	0.117086	1.1889e-05
P02545	LMNA	Down	34.4292	34.4536	34.5803	32.9823	32.8668	32.8804	0.33498	1.19093e-05
P37837	TALDO1	Down	31.7458	31.6986	31.7517	30.7007	30.5891	30.698	0.476519	1.21547e-05
Q01995	TAGLN	Down	34.4455	34.602	34.4979	32.9528	33.0377	33.0689	0.354695	1.3084e-05
O95810	CAVIN2	Down	27.0215	27.0668	26.8053	24.7364	24.7032	24.6186	0.20612	1.32078e-05
F8W1R7	MYL6	Down	33.3829	33.3548	33.4145	31.9221	31.9132	31.7472	0.347909	1.3777e-05
Q07507	DPT	Down	30.2722	30.1613	30.2438	27.3719	26.9701	27.127	0.119124	1.45998e-05
Q9BSD7	NTPCR	Down	25.9184	26.0879	26.1023	24.3052	24.4114	24.3562	0.312383	1.46605e-05
P30049	ATP5F1D	Down	29.7467	29.7628	29.9021	28.0412	28.1651	28.1849	0.313504	1.50422e-05
Q14247	CTTN	Down	29.3659	29.4353	29.4202	28.1	28.1203	27.9625	0.393319	1.52213e-05
Q5T5P2	KIAA1217	Down	26.7326	26.7208	26.6359	25.6716	25.6001	25.5623	0.471371	1.63683e-05
P00352	ALDH1A1	Down	31.3374	31.2736	31.3132	30.1778	30.179	30.2995	0.469997	1.64324e-05
K7EIJ0	WBP2	Down	25.6679	25.7614	25.7129	23.9414	24.1171	23.9028	0.302085	1.72166e-05
P14314	PRKCSH	Down	31.4831	31.5321	31.4699	30.3835	30.513	30.4877	0.488471	1.93091e-05
P12111	COL6A3	Down	31.6965	31.6899	31.7131	30.2208	30.2856	30.4209	0.381371	1.96734e-05
P21291	CSRP1	Down	32.4226	32.6793	32.666	30.3809	30.2527	30.1987	0.201401	2.02456e-05
P00167	CYB5A	Down	30.6344	30.7614	30.7905	28.0678	28.3837	28.1113	0.171804	2.07011e-05
K7EM02	KATNAL2	Down	26.2095	26.1422	26.3856	23.5732	23.6488	23.3367	0.151123	2.13278e-05
P09382	LGALS1	Down	33.8879	33.8987	33.8937	32.7914	32.7352	32.8966	0.471168	2.1541e-05
P01871	IGHM	Down	29.9047	30.0755	30.0398	28.8056	28.7621	28.7661	0.426689	2.18277e-05
O95497	VNN1	Down	27.0581	26.851	26.9508	21.696	21.8971	21.133	0.0240476	2.20941e-05
P08294	SOD3	Down	29.9043	29.7269	29.7439	27.9773	27.996	28.1456	0.296887	2.28415e-05
O60869	EDF1	Down	27.1618	27.3221	27.4044	25.5332	25.5186	25.6163	0.299351	2.32301e-05
Q99880	H2BC13	Down	31.7366	31.7747	31.8829	29.9387	30.1306	30.1285	0.30102	2.34365e-05
P14543	NID1	Down	29.2956	29.1572	29.1883	28.019	27.9794	27.8941	0.420583	2.35915e-05
P01009	SERPINA1	Down	33.0612	33.0543	33.1058	31.7909	31.9329	31.7596	0.421617	2.36466e-05
P02787	TF	Down	33.8936	33.9445	33.9715	32.8472	32.8222	32.9585	0.479464	2.42696e-05
P17931	LGALS3	Down	32.7326	32.7084	32.7877	30.5705	30.2173	30.3168	0.192817	2.50607e-05
P62736	ACTA2	Down	36.3224	36.2964	36.2477	34.8712	34.8954	35.0596	0.393167	2.84993e-05
A0A1X7SC65	HSPB6	Down	29.1458	29.282	29.2216	26.7251	27.0451	27.0007	0.20407	2.86382e-05
H3BN72	COX4I1	Down	28.1916	28.031	28.0398	26.9866	26.9909	26.9777	0.465742	2.98765e-05
E9PMU0	NAT10	Down	26.1497	26.288	26.2195	24.3236	24.3696	24.5708	0.287625	3.06098e-05
P24844	MYL9	Down	31.8289	31.5815	31.753	30.207	30.1567	30.1524	0.341718	3.28893e-05
Q5T7C4	HMGB1	Down	31.5422	31.6428	31.7731	30.0567	30.1226	30.1822	0.345757	3.57806e-05
C9JMC5	ALDH3A1	Down	28.6798	28.6074	28.6285	24.4522	24.3624	25.0061	0.0611435	3.74886e-05
Q12841	FSTL1	Down	26.07	25.9199	26.0188	24.7912	24.7779	24.9061	0.442014	3.96717e-05
P61457	PCBD1	Down	29.0681	29.4435	29.2	27.0187	26.8851	26.8946	0.202443	4.06347e-05
P51608	MECP2	Down	26.9549	27.0956	27.3545	24.6367	24.6907	24.7853	0.185468	4.09803e-05
P15559	NQO1	Down	30.1272	30.0919	30.1453	26.5263	26.5316	27.0632	0.093788	4.42978e-05
E9PKZ0	RPL8	Down	27.298	27.485	27.6532	24.817	24.5842	24.9166	0.153241	4.49548e-05
P29536	LMOD1	Down	27.6577	27.7734	27.7056	25.999	25.9828	26.2295	0.320456	4.52836e-05
P12277	CKB	Down	31.0572	31.0971	30.8761	29.6769	29.7288	29.703	0.404089	4.74465e-05
P55268	LAMB2	Down	29.079	28.9518	29.0072	27.1151	27.3647	27.3799	0.302262	5.04902e-05
Q9BRT3	MIEN1	Down	24.9411	25.3034	25.1549	21.7787	21.9444	21.4268	0.0936552	5.09402e-05
P26447	S100A4	Down	30.5286	30.6844	30.74	29.019	28.8185	28.7852	0.29184	5.1441e-05
Q9Y3E1	HDGFL3	Down	26.7091	26.6457	26.7623	25.2072	25.4468	25.3249	0.384378	5.68504e-05
P05090	APOD	Down	26.4575	26.3745	26.5556	25.2441	25.079	25.1995	0.409413	5.70687e-05
Q9UBI6	GNG12	Down	27.5883	27.4114	27.4988	26.39	26.2435	26.314	0.440233	5.78099e-05
Q9Y237	PIN4	Down	25.8822	26.0253	25.927	24.6185	24.5127	24.7249	0.398846	5.82873e-05
P00740	F9	Down	24.0729	24.209	23.9344	22.6581	22.5983	22.6384	0.368436	5.92538e-05
P25815	S100P	Down	29.4806	29.4062	29.3035	25.5713	25.3614	26.0556	0.0751566	6.08821e-05
P80188	LCN2	Down	29.545	29.5775	29.4708	28.5127	28.3736	28.5375	0.480795	6.1105e-05
C9J0K6	SRI	Down	30.1454	29.9813	30.0932	28.4897	28.5961	28.3298	0.329542	6.19898e-05
O60504	SORBS3	Down	24.9977	24.9479	24.8898	23.7354	23.8014	23.9304	0.459224	6.67248e-05
P23141	CES1	Down	28.2317	28.0586	28.0914	25.7619	25.5965	26.0265	0.198576	6.78569e-05
Q15582	TGFBI	Down	30.1409	30.2393	30.1839	29.0978	29.0296	29.2204	0.475627	6.84226e-05
A0A2R8Y811	RPS14	Down	28.7306	28.4891	28.3986	25.4276	25.7789	25.866	0.13883	6.86813e-05
P04275	VWF	Down	27.2889	27.2254	27.3503	25.8898	25.8422	26.0746	0.391563	6.99936e-05
P07585	DCN	Down	30.2928	30.3127	30.2432	28.7048	28.5178	28.8339	0.330477	7.04424e-05
G3XAL9	SLC12A2	Down	26.6505	26.6948	26.6966	23.973	24.4449	24.0269	0.172853	7.19419e-05
A0A5F9UJX7	SDF4	Down	27.1445	27.1971	27.3297	25.8807	26.0525	25.922	0.414063	7.31122e-05
P25311	AZGP1	Down	28.5651	28.3495	28.5171	27.1695	27.2843	27.2556	0.423145	7.37863e-05
A0A590UJZ9	DMBT1	Down	27.3353	27.1612	27.304	24.4293	24.9353	24.6699	0.166239	7.65944e-05
Q15274	QPRT	Down	29.0793	28.9856	29.0328	27.3295	27.5621	27.6164	0.346299	7.68294e-05
O75610	LEFTY1	Down	28.9197	29.0122	28.8602	25.4936	24.9782	25.6778	0.0855256	7.75518e-05
Q13435	SF3B2	Down	28.2992	28.3484	28.4447	27.1585	27.3395	27.2511	0.46188	7.88743e-05
H3BPC4	UBE2I	Down	27.6346	27.8778	27.5259	25.209	25.228	24.8686	0.16752	7.93179e-05
Q99988	GDF15	Down	26.1271	26.1368	26.1531	24.018	23.5577	23.6054	0.1879	7.93686e-05
H0Y9M8	NDUFS4	Down	26.7385	26.4548	26.5554	25.0983	25.0649	25.1759	0.361019	7.98859e-05
Q16864	ATP6V1F	Down	26.5156	26.7321	26.6498	24.3537	24.5347	24.7395	0.234906	8.2479e-05
Q6GMV3	PTRHD1	Down	25.9326	26.1268	26.1105	22.2098	22.4006	21.6142	0.0632956	8.37015e-05
Q9H190	SDCBP2	Down	24.5754	24.2009	24.5011	21.408	21.5466	21.0304	0.116831	8.65085e-05
Q2TAM5	RELA	Down	26.7115	26.5841	26.8197	24.9829	25.2375	25.0918	0.329646	9.03269e-05
E9PNK6	TPD52L1	Down	27.9474	28.0074	27.9194	22.9843	21.7744	22.3712	0.0208842	9.06274e-05
P00325	ADH1B	Down	29.4797	29.7188	29.7687	27.2698	26.87	26.8215	0.157278	9.12021e-05
Q9Y5Z4	HEBP2	Down	30.2139	30.0343	29.905	28.563	28.5768	28.4712	0.350119	9.24676e-05
J3QL05	SRSF2	Down	28.1488	28.1187	28.3308	27.0706	27.1271	27.0369	0.459692	9.55133e-05
C9J712	PFN2	Down	26.1512	26.0484	26.2611	24.7751	24.9173	24.7133	0.391842	9.63344e-05
V9GYS5	HDDC2	Down	22.8829	22.9757	22.9298	21.3884	21.2911	21.6035	0.35312	9.78793e-05
A0A2U3TZH4	PDLIM3	Down	27.914	27.6921	27.793	26.7153	26.5995	26.6027	0.447339	9.96032e-05
O60218	AKR1B10	Down	30.0104	29.9275	29.1575	22.2809	22.8256	21.4321	0.00545222	0.000103521
O75380	NDUFS6	Down	26.2956	26.2199	26.1627	25.0447	25.0275	24.8166	0.416647	0.000107728
F8W099	#NA	Down	24.0197	23.692	23.8163	21.8243	21.9236	22.0979	0.269045	0.000109113
Q8IWE2	FAM114A1	Down	25.9565	26.0987	26.2101	24.8961	24.9238	24.8215	0.43287	0.000109435
P53634	CTSC	Down	29.2557	29.4012	29.5064	28.2975	28.2488	28.2451	0.458836	0.000113341
Q9NZT1	CALML5	Down	30.1023	30.1927	30.4002	22.0581	21.3816	20.0254	0.001852	0.000114323
O95881	TXNDC12	Down	27.9607	27.9597	28.2185	26.4731	26.4927	26.644	0.351179	0.000119544
Q03135	CAV1	Down	28.4841	28.5973	28.7024	27.473	27.3689	27.5175	0.453288	0.000119973
P02749	APOH	Down	29.7621	29.841	29.8361	28.4637	28.7224	28.5042	0.42055	0.000120525
P31942	HNRNPH3	Down	30.4382	30.4864	30.2211	29.1882	29.1352	29.1588	0.428928	0.000124311
P51888	PRELP	Down	31.8984	32.1406	31.8927	29.5773	29.4851	29.9268	0.201077	0.000124524
K7EMR1	GRN	Down	26.9173	27.47	27.4552	23.7079	23.0252	23.2874	0.0651248	0.000127119
P22061	PCMT1	Down	28.0418	28.3868	28.0663	25.9862	26.2353	26.2286	0.247423	0.000128305
Q15404	RSU1	Down	27.8651	27.7385	27.8522	26.8154	26.6378	26.8231	0.479704	0.000128592
A0A3B3IUA2	SNU13	Down	30.1248	30.2682	30.2792	28.5674	28.7008	28.3424	0.310527	0.000129141
P16157	ANK1	Down	27.6321	27.5447	27.5446	26.3771	26.3366	26.5736	0.452279	0.000130398
O43399	TPD52L2	Down	29.371	29.4537	29.3867	28.0171	28.2877	28.0502	0.410249	0.000133088
P52943	CRIP2	Down	28.2529	28.3903	28.3722	26.9141	27.0248	27.1856	0.40698	0.000133676
P62851	RPS25	Down	27.3718	27.426	27.5613	26.4077	26.279	26.4452	0.474434	0.000141287
P05186	ALPL	Down	25.5192	25.5339	25.7399	24.2669	24.2985	24.4397	0.416782	0.00014263
Q96IZ0	PAWR	Down	27.1753	27.0113	26.9163	25.8264	25.7184	25.6402	0.404451	0.000148813
O43294	TGFB1I1	Down	28.6161	28.7625	28.4907	27.3212	27.4184	27.4478	0.427122	0.000148926
P28074	PSMB5	Down	25.7736	25.6244	25.8185	24.7332	24.5581	24.5986	0.463667	0.000149733
Q14508	WFDC2	Down	29.2491	29.3365	28.8907	27.09	27.2047	27.2266	0.252609	0.000155368
P23946	CMA1	Down	26.2582	26.0152	26.0811	23.7176	24.032	23.494	0.193404	0.000160946
Q9UBX5	FBLN5	Down	28.7352	28.6626	28.7041	26.4243	26.8769	26.8358	0.252033	0.000168463
K7ES72	CAPS	Down	28.0395	27.9148	28.0937	26.7565	26.9138	26.9759	0.455668	0.00017478
A0A0C4DGA2	ECI2	Down	27.1534	27.192	27.0573	25.8519	25.5482	25.5391	0.356543	0.000174814
Q07654	TFF3	Down	29.6839	29.4313	29.5122	25.5286	25.6504	24.6752	0.0522756	0.000174865
Q9P016	THYN1	Down	27.0692	27.124	27.235	25.6613	25.663	25.3379	0.33249	0.000179507
Q9NZN4	EHD2	Down	31.172	31.0707	30.9662	29.6548	29.4445	29.7543	0.365577	0.000183246
P53999	SUB1	Down	29.3514	29.331	29.3608	27.3778	27.5216	27.8284	0.292842	0.000184458
Q9UNZ2	NSFL1C	Down	29.7446	29.5394	29.7182	28.5618	28.4255	28.3341	0.427214	0.000185504
F6WIT2	PTPA	Down	26.5645	26.5514	26.2593	24.8323	25.0196	24.9731	0.349472	0.000187223
P61604	HSPE1	Down	32.2815	32.514	32.5587	31.2503	31.1182	31.099	0.407376	0.000190655
O75828	CBR3	Down	28.2519	28.282	28.4917	26.4606	26.8072	26.4981	0.296639	0.000192669
P36578	RPL4	Down	29.0807	29.0353	29.1553	27.9121	28.1418	28.104	0.487063	0.000196458
A0A087X0W7	ACOT2	Down	26.2727	26.3721	26.24	24.7636	24.9831	25.0874	0.392229	0.000198211
A0A0A0MS87	NDRG2	Down	26.6842	26.472	26.3938	24.577	24.8737	24.8877	0.299953	0.000200615
E9PES6	HMGB3	Down	24.3357	24.2033	24.4193	21.5164	21.8082	22.144	0.177201	0.00020147
O95994	AGR2	Down	33.1012	32.81	32.7916	31.3134	31.0711	31.3354	0.316227	0.000224426
A0A0A0MTC7	LAMA4	Down	28.2128	28.4485	28.5971	26.6197	26.6088	26.3116	0.266814	0.000225062
P42765	ACAA2	Down	28.0745	27.8495	28.2641	26.4869	26.3596	26.2797	0.310502	0.000229864
P23284	PPIB	Down	32.3509	32.5198	32.4821	31.2407	31.2745	31.4748	0.459787	0.000230698
H0YIV9	#NA	Down	26.7676	26.6443	26.7958	23.5503	22.5438	22.9047	0.0750345	0.000232944
P07305	H1-0	Down	30.6207	30.3327	30.6362	29.1554	29.2755	29.2366	0.404065	0.000237793
P46778	RPL21	Down	27.5905	27.684	27.5536	25.8778	25.7197	26.1638	0.310156	0.000239175
P45877	PPIC	Down	27.7182	27.8595	27.7361	26.797	26.8416	26.6155	0.493155	0.000242096
O43920	NDUFS5	Down	28.4531	28.1674	28.1546	26.752	26.9345	26.9085	0.380669	0.000247533
Q5T6W2	HNRNPK	Down	27.1982	27.0508	27.415	24.7656	25.0446	25.2612	0.218009	0.000248456
P00915	CA1	Down	32.4844	32.4935	32.6491	31.5829	31.3429	31.5044	0.477768	0.000274055
P10599	TXN	Down	31.6284	31.9949	31.8855	30.5216	30.5432	30.4939	0.401458	0.000274772
Q92597	NDRG1	Down	28.6461	28.5329	28.6829	27.4059	27.1472	27.4629	0.411236	0.000279134
P10606	COX5B	Down	29.6437	29.894	30.115	27.1359	27.6113	27.0669	0.163472	0.000281045
Q8WXK1	ASB15	Down	26.1538	26.3226	26.3409	21.9793	21.6735	20.6049	0.0345975	0.000322868
O95865	DDAH2	Down	28.206	28.059	28.366	26.8185	26.6527	26.9429	0.377445	0.000325888
Q9NPJ3	ACOT13	Down	25.9305	25.6992	26.0957	23.0391	22.2762	22.1639	0.0937264	0.000330857
C9JRD2	DNAJB2	Down	25.5431	25.819	25.5794	24.5789	24.6338	24.5026	0.47455	0.000340565
Q15847	ADIRF	Down	23.8596	24.1955	24.054	22.0913	22.1392	22.4873	0.287759	0.000343085
O75821	EIF3G	Down	24.9441	25.0005	24.7719	22.6039	22.8854	23.1736	0.246921	0.000347309
P51178	PLCD1	Down	25.1726	25.1132	25.5439	23.7628	23.7455	23.7451	0.347371	0.000348567
A0A087X1K9	LYPLA1	Down	26.5286	26.6668	26.5868	25.1986	25.5083	25.4782	0.435562	0.000353687
Q8IWJ2	GCC2	Down	24.9137	25.0184	24.915	24.0872	23.9401	23.8004	0.497753	0.000360757
P15088	CPA3	Down	25.681	25.6454	25.752	24.5906	24.2378	24.2524	0.397069	0.000367352
P48047	ATP5PO	Down	30.2328	30.181	30.041	28.0585	28.3174	27.6897	0.228494	0.000367722
Q9UNF0	PACSIN2	Down	28.5084	28.6421	28.604	27.5736	27.2397	27.3186	0.433011	0.000368322
P52565	ARHGDIA	Down	29.3014	29.5057	29.2956	28.2727	28.3359	28.4712	0.497373	0.000371077
Q7RTV0	PHF5A	Down	25.5108	25.5951	25.6634	22.4929	21.3572	21.8279	0.0771034	0.000371772
C9JQ41	CCDC58	Down	25.818	25.9838	26.0502	23.846	23.2218	23.783	0.198367	0.000373557
A0A075B7D9	TAF15	Down	25.6208	25.6897	25.6933	24.4481	24.7616	24.5058	0.467771	0.000380827
P36405	ARL3	Down	25.2314	25.7142	25.3145	23.7251	23.6174	23.7706	0.304463	0.000386473
Q99497	PARK7	Down	30.8061	30.9869	30.7249	29.8071	29.9231	29.7462	0.495229	0.000405315
Q96M29	TEKT5	Down	24.5642	24.7593	24.7347	22.2145	21.4124	21.3972	0.124016	0.000405396
E1CKY7	PPP1R12B	Down	25.0053	24.9238	25.4922	22.5359	21.8664	21.9169	0.122086	0.000405724
Q15848	ADIPOQ	Down	25.4839	26.0312	25.9815	23.0505	23.4359	23.5449	0.178199	0.000415879
Q86WR0	CCDC25	Down	25.0221	25.0861	24.9717	23.7972	23.7166	24.0595	0.444768	0.000423843
Q14677	CLINT1	Down	28.6638	28.5916	28.6233	27.4176	27.585	27.7471	0.485316	0.000430479
Q969G5	CAVIN3	Down	29.3341	29.1639	29.1372	26.3507	26.342	27.0592	0.161796	0.000431698
Q15661	TPSAB1	Down	29.7563	30.0384	29.9094	28.5047	28.0685	28.173	0.31805	0.000435082
P20774	OGN	Down	31.8875	31.8842	31.5447	30.2382	30.462	30.2283	0.362822	0.0004353
P53814	SMTN	Down	24.9821	25.0771	25.4112	23.1255	22.4967	22.7434	0.193675	0.000456555
E7EPV7	SNCA	Down	26.6772	26.6034	26.803	24.962	25.2342	24.703	0.301842	0.000459346
Q92522	H1FX	Down	26.3163	26.286	26.5406	25.3435	25.0859	25.1223	0.436167	0.000460238
H0YNW5	DUT	Down	26.2028	26.1258	25.8341	24.8938	24.8681	24.8074	0.435942	0.000482911
P56385	ATP5ME	Down	24.2345	24.4093	24.2807	21.8604	21.8616	21.0971	0.153702	0.000483805
Q99961	SH3GL1	Down	26.0938	25.9198	25.8842	24.317	23.7197	24.0825	0.263125	0.000484811
P48059	LIMS1	Down	29.1394	28.9201	29.4088	27.0296	27.4284	27.0515	0.25239	0.000489056
A0A0C4DH34	IGHV4-28	Down	26.1195	26.3858	26.1994	25.0166	25.2162	24.9395	0.442128	0.000497796
B5MCZ9	QPCT	Down	25.604	26.1209	25.682	22.0657	22.3614	23.0199	0.100137	0.00051542
H0YA68	MAN2B2	Down	23.4728	23.5315	23.7064	22.5752	22.2687	22.3899	0.447836	0.000516979
Q58FF8	HSP90AB2P	Down	26.5735	27.0454	26.9333	25.0184	25.3128	25.1234	0.307954	0.000518093
Q8IVN8	SBSPON	Down	24.1495	24.3143	24.415	22.0982	21.3874	21.295	0.153955	0.000525249
Q9Y3U8	RPL36	Down	27.7075	27.6994	27.7358	25.9554	26.4456	26.2992	0.358274	0.000527837
P10301	RRAS	Down	27.8434	27.6964	27.5463	25.1995	25.8759	25.4154	0.217872	0.000535538
Q96DV4	MRPL38	Down	24.2213	24.4753	24.5205	23.3491	23.3035	23.1387	0.453162	0.000538627
P16452	EPB42	Down	25.2945	25.6072	25.4137	23.8386	23.7292	24.1366	0.344596	0.000539355
C9JXB8	RPL24	Down	26.1074	26.3761	26.3612	25.1081	25.0211	24.7838	0.403152	0.000550724
D6RD17	JCHAIN	Down	27.6494	27.4896	27.7238	26.0784	26.4572	26.3606	0.39992	0.000574896
A0A0U1RQI5	SORBS1	Down	28.2322	28.2917	28.1283	25.8389	25.7814	25.0184	0.157001	0.000575313
G3V2D5	ZFP36L1	Down	24.2696	24.6959	25.0777	21.5762	21.8066	22.1705	0.140639	0.000621969
Q6S8J3	POTEE	Down	28.5831	28.7315	28.7941	27.1479	27.5552	27.1801	0.376702	0.000627608
Q15435	PPP1R7	Down	28.7657	28.7617	28.8748	27.8631	27.7277	27.4944	0.464687	0.000629642
C9J8P9	CLTA	Down	28.9362	28.9342	29.0818	27.7185	27.8486	28.0726	0.465167	0.000644176
Q59GN2	RPL39P5	Down	25.8729	25.9316	25.9489	22.2309	23.2791	22.1887	0.0979671	0.000720229
Q96A35	MRPL24	Down	23.4302	23.5371	23.2349	22.422	22.1409	22.2814	0.460333	0.000737235
O00273	DFFA	Down	26.4341	26.8266	26.8737	24.6277	25.1137	24.742	0.270989	0.000740918
A0A087WWF1	SELENOM	Down	26.797	26.9716	26.7307	24.4908	24.0308	24.8831	0.194134	0.000769715
K7ELW3	EPS8L1	Down	23.9629	24.2378	24.2797	22.5561	22.879	22.9114	0.384771	0.00079606
Q6YHK3	CD109	Down	24.7844	24.9324	24.9358	22.4572	21.5734	21.3514	0.11742	0.000825491
Q96I24	FUBP3	Down	26.7944	27.1728	26.8942	25.7587	25.8402	25.5888	0.42792	0.000825797
Q96DG6	CMBL	Down	26.6242	26.7735	26.8566	25.3308	25.2204	25.6617	0.393068	0.000829286
K7EQX8	MXRA7	Down	23.1412	23.1417	23.2119	21.5898	22.0624	21.9455	0.406403	0.000837346
Q9UK45	LSM7	Down	25.1265	25.1126	26.0945	21.7447	22.3876	22.0867	0.0966209	0.000841461
A0A1W2PQV2	GCSH	Down	26.0103	26.0835	26.2399	24.8267	24.699	24.3197	0.354504	0.000851527
P55036	PSMD4	Down	26.8572	26.8894	27.2719	24.1765	24.9889	24.3705	0.177487	0.000863816
H3BMT0	JPT2	Down	25.6145	25.7523	25.9894	24.5069	24.6236	24.2836	0.402201	0.000891663
E9PD69	HPGD	Down	25.8715	25.6907	26.0402	24.5024	24.7987	24.4759	0.413185	0.000911227
P82979	SARNP	Down	27.6245	27.6027	27.9653	26.7145	26.6501	26.6002	0.474377	0.000911677
P26885	FKBP2	Down	27.8566	27.9201	28.0511	26.8628	26.8393	26.4669	0.429401	0.000967899
E5RGS4	PFDN1	Down	26.5717	26.4901	26.2349	25.1733	25.3825	25.4323	0.465595	0.00102144
Q5T0I0	GSN	Down	26.6893	26.7908	26.8247	22.8075	21.0328	20.9709	0.0278818	0.00102398
Q96CT7	CCDC124	Down	26.994	27.0702	27.4066	25.9723	25.9255	26.0894	0.44714	0.00102677
F6UZG9	FBH1	Down	24.7406	24.6516	24.8866	21.7584	21.7749	20.5956	0.0958337	0.00103361
P02743	APCS	Down	27.8031	27.639	27.8492	26.3637	26.7886	26.6048	0.441942	0.00104981
K7EN58	BLOC1S3	Down	24.9187	24.4662	24.396	22.6735	21.9733	22.4367	0.212795	0.00105477
Q9BVG4	PBDC1	Down	27.085	26.7572	26.9946	25.9749	25.6536	25.794	0.454358	0.00108101
O00264	PGRMC1	Down	27.2506	26.9727	26.9814	25.9576	25.7546	25.5016	0.397681	0.00115301
A0A1W2PRU0	ENSA	Down	25.2291	25.5909	25.5735	20.5767	21.2785	22.2627	0.0586438	0.00124207
P31323	PRKAR2B	Down	24.0244	23.9187	24.1092	23.0782	22.6342	22.9103	0.45277	0.00124732
P48163	ME1	Down	25.5447	25.5028	25.6612	21.2874	21.8193	22.8102	0.0826259	0.00131328
P02656	APOC3	Down	27.8371	27.9233	28.1005	21.9707	23.9448	21.9403	0.0247739	0.00132997
H3BQ23	CIAPIN1	Down	25.994	25.904	25.5959	24.438	24.7468	24.6682	0.431187	0.001335
K7ENJ0	RAD23A	Down	25.0837	24.8152	24.9967	22.364	21.0532	21.9836	0.111495	0.00134546
Q9BPX5	ARPC5L	Down	25.9928	26.3525	26.5237	25.0718	24.8696	25.0007	0.403605	0.00144012
P47813	EIF1AX	Down	26.8131	26.8169	26.8781	25.36	24.852	25.5241	0.332014	0.00144324
O75964	ATP5MG	Down	26.1637	26.4239	26.461	25.1605	25.2595	24.8156	0.41438	0.00148824
F6QUH3	AFAP1L2	Down	24.3572	23.9554	24.292	22.3726	22.7968	22.1427	0.294394	0.00151424
H7BYX6	NCAM1	Down	24.3726	24.2357	24.405	22.3979	22.6978	21.8119	0.243965	0.0015515
Q8WW59	SPRYD4	Down	25.9577	25.7814	26.1178	24.1678	23.7854	23.2223	0.213581	0.001572
P53597	SUCLG1	Down	27.904	27.7941	27.994	26.6238	26.9529	27.0223	0.489365	0.00161562
Q5SRE7	PHYHD1	Down	26.2361	26.6457	26.8022	25.1314	25.2116	24.8813	0.356865	0.00161747
A0A0U1RQQ4	PROCR	Down	23.7754	24.1163	24.1485	22.4735	22.3514	21.7995	0.286127	0.00165209
Q6P1N0	CC2D1A	Down	23.3457	23.4185	22.9673	21.9518	21.4402	21.4697	0.324602	0.00170644
Q9NUP9	LIN7C	Down	27.4533	26.8637	26.7843	25.139	25.108	25.469	0.288155	0.0017227
P16401	H1-5	Down	29.8478	29.8335	30.0632	28.4008	28.1043	28.749	0.354335	0.00172279
P61960	UFM1	Down	27.1307	27.5579	27.3009	26.0694	25.7763	26.2064	0.40263	0.00178394
C9JYQ9	RPL22L1	Down	26.0932	25.8452	26.2254	24.8302	24.5676	25.0076	0.419642	0.00178953
B4DK69	AKR1C2	Down	30.1244	30.1218	30.0767	22.2291	25.1202	22.3985	0.00861853	0.00185256
Q9UKD2	MRTO4	Down	25.4964	25.667	25.5297	24.0211	24.4335	24.5628	0.427724	0.00202996
Q8N474	SFRP1	Down	24.406	25.0995	25.2758	22.491	22.5167	21.6967	0.154716	0.00205471
B7Z964	SLMAP	Down	24.8496	25.0276	24.9427	23.8833	23.6839	24.1531	0.488624	0.00206878
P63313	TMSB10	Down	28.8114	28.8194	28.8974	27.9447	27.8965	27.4741	0.475995	0.00213888
A0A0C4DH07	LTBP4	Down	25.2785	24.9593	25.1158	23.8687	23.6686	24.1722	0.430869	0.00216685
A0A087WYP2	SELENOH	Down	25.6668	25.3031	25.6127	24.0895	24.1393	23.5155	0.326967	0.00217806
A0A2R8Y5A1	#NA	Down	24.8083	25.0091	24.5267	23.2614	23.6662	23.5472	0.409027	0.00219943
H9KV75	ACTN1	Down	27.0463	27.0044	26.8874	25.8118	25.1208	25.6237	0.363339	0.00231233
Q8IVM0	CCDC50	Down	23.0164	23.1533	23.1908	22.0221	21.9296	22.3785	0.496498	0.00233383
H0YJW7	SLIRP	Down	26.9504	26.9158	27.2238	25.9685	26.2384	25.8736	0.498908	0.00237268
H0YDR3	TTC9C	Down	25.1287	25.561	25.3344	24.3345	23.9497	23.8741	0.409354	0.00244328
B4E2I4	GCLC	Down	25.2533	25.2107	25.0364	24.2468	23.6739	23.9499	0.432292	0.00245905
A0A075B6K5	IGLV3-9	Down	25.8066	26.1739	26.1367	24.9459	24.3604	24.6233	0.380015	0.00245999
Q8TD55	PLEKHO2	Down	23.8051	23.6283	23.4817	22.2909	21.6139	21.4511	0.276801	0.00248003
P02452	COL1A1	Down	26.5205	25.9508	26.5475	24.4862	24.6943	24.97	0.324707	0.00248535
H7BZ55	CROCC2	Down	26.9967	26.554	26.5602	22.3123	22.1421	23.9014	0.0661382	0.00248854
Q9UQN3	CHMP2B	Down	23.9916	23.7661	23.9985	22.2696	22.9061	22.4202	0.382414	0.00256766
P02760	AMBP	Down	27.7578	27.8437	27.7778	26.3847	26.9568	26.6777	0.460089	0.00258425
Q9HAU0	PLEKHA5	Down	25.2829	25.2289	25.2959	24.259	23.5865	23.6488	0.369133	0.00262466
S4R313	PALMD	Down	24.549	24.4995	24.2878	22.3291	22.7553	21.6506	0.21757	0.00267285
B4DJV5	PWP1	Down	23.0679	23.3321	23.5164	21.7136	22.1315	22.1731	0.406293	0.00269278
P61081	UBE2M	Down	24.3629	24.4125	25.0945	20.7311	22.2035	21.3708	0.10972	0.00282001
Q8NEX6	WFDC11	Down	25.3935	25.0875	24.7791	21.6749	22.329	23.0039	0.148575	0.00287662
B8ZZJ0	SUMO1	Down	26.6046	27.0395	26.9178	25.9689	25.6693	25.876	0.494544	0.00293329
Q5SYZ4	CRABP2	Down	23.1988	22.6083	23.2477	21.6379	21.6223	21.7676	0.394371	0.00310552
Q15691	MAPRE1	Down	26.8904	27.2052	27.1045	26.2052	25.8471	25.6673	0.447458	0.00318974
Q14112	NID2	Down	27.1503	27.435	27.475	24.4885	24.4053	25.6058	0.174312	0.00325248
Q14118	DAG1	Down	27.4809	28.0679	27.8957	26.7743	26.6426	26.6129	0.454314	0.0032769
Q14515	SPARCL1	Down	23.8667	23.8852	23.4276	22.6218	22.4861	22.126	0.401868	0.00333624
P12694	BCKDHA	Down	24.7401	25.1942	24.9389	23.7553	23.8421	23.2938	0.398502	0.0034964
O00425	IGF2BP3	Down	23.9874	24.1972	24.373	23.0481	22.5512	22.2702	0.33852	0.00350273
F5H610	PRKAB1	Down	24.1427	23.8246	23.9609	21.5197	21.9577	22.5699	0.256973	0.00352242
P52823	STC1	Down	24.7821	24.513	25.0631	23.5881	23.539	23.0892	0.384044	0.00354787
J3KRN5	PRKCA	Down	24.6896	24.2063	24.129	21.8513	21.4485	22.6228	0.193792	0.0036027
Q9NYL2	MAP3K20	Down	25.4269	25.7588	25.525	23.3655	24.3137	23.6922	0.291224	0.00380536
E9PGT6	COPS8	Down	27.2918	26.9126	26.6414	25.8062	25.842	25.7723	0.453204	0.00383598
P03973	SLPI	Down	26.9673	26.9003	27.1473	20.306	22.471	23.0735	0.0300842	0.00390017
P28072	PSMB6	Down	27.7809	27.9396	27.2255	26.0372	26.1584	26.4165	0.367384	0.00405477
Q5VY30	RBP4	Down	27.4549	27.6422	27.7248	26.6599	26.8322	26.3241	0.499337	0.004075
Q9H9H4	VPS37B	Down	23.8704	23.9043	24.401	23.0462	22.7315	22.9467	0.450504	0.00413235
P55083	MFAP4	Down	29.7499	29.3564	29.8408	28.2027	28.5429	28.652	0.440389	0.00416331
P50479	PDLIM4	Down	28.1457	27.6031	28.0535	27.01	26.866	26.8412	0.490256	0.00424892
H0YKL0	HMG20A	Down	25.2252	25.1843	25.18	24.4184	24.1548	23.773	0.472675	0.0045234
O95816	BAG2	Down	25.7214	25.3605	25.2628	24.2772	23.7808	24.3829	0.405773	0.00497794
P50238	CRIP1	Down	29.5951	29.8296	29.6287	28.0262	28.4881	28.7644	0.418054	0.00521583
E9PKV2	MRPL17	Down	24.2624	23.8633	24.0763	22.5559	23.1983	22.8102	0.431519	0.0052474
J3QRP6	SLC9A3R1	Down	24.3187	24.108	23.6697	22.9822	22.8627	23.0103	0.472889	0.00532826
A0A0A0MR85	GSTM4	Down	26.4266	26.7453	26.4785	24.1786	23.3561	22.1	0.0988499	0.00549984
E7EVW7	HCLS1	Down	25.2622	25.5612	25.4311	23.6694	24.4818	23.7948	0.369552	0.00576771
A0A087X0K0	COL15A1	Down	24.7223	24.7526	24.5946	21.9532	21.1942	22.9157	0.157255	0.00595396
A0A5H1ZRS2	IGKV2D-28	Down	28.0034	27.2895	28.1545	26.2173	26.5066	26.2892	0.358966	0.00621947
P41222	PTGDS	Down	24.9556	24.6513	24.7851	23.2148	22.1165	21.6284	0.179565	0.0065589
Q0VF96	CGNL1	Down	23.9053	24.3947	24.0881	22.8699	23.3298	23.1643	0.497217	0.00679441
Q9UD71	PPP1R1B	Down	24.5836	24.8736	24.6558	22.9858	21.6475	21.2293	0.148638	0.00687476
P17568	NDUFB7	Down	24.8497	24.7071	24.6869	22.3273	22.5129	20.7429	0.135199	0.00689053
O15391	YY2	Down	23.4739	23.8591	23.6857	21.4973	22.4102	22.3331	0.331546	0.00702239
A0A087WV90	DMD	Down	26.5915	26.5642	26.0999	22.7825	24.3805	22.2785	0.103565	0.00745414
P55290	CDH13	Down	27.9821	27.8324	27.7231	25.8722	26.1973	24.7237	0.210499	0.00770597
P02750	LRG1	Down	27.1508	26.9271	26.9311	25.7848	25.6203	26.3169	0.467928	0.00794768
D6R974	UCHL1	Down	24.8699	25.7546	25.3889	21.5009	22.7172	20.1247	0.0674421	0.00796229
B1ANR0	PABPC4	Down	26.1471	26.4066	26.8121	24.7692	24.9954	25.4675	0.384773	0.00816805
C9JFK9	BAG3	Down	22.9239	22.7747	22.7244	20.6457	19.8589	21.4068	0.222131	0.0085595
A0A0G2JR65	MUC2	Down	23.4278	24.4527	24.0971	22.6722	22.2498	22.1224	0.319881	0.00871503
H0Y4J5	PDIA2	Down	23.8087	24.2361	23.572	22.2925	22.9369	22.4811	0.405535	0.00880867
Q9HAV7	GRPEL1	Down	26.4394	26.2099	27.3317	24.8999	25.0529	24.3676	0.270402	0.00921258
Q9Y4G6	TLN2	Down	24.8571	24.8305	24.8925	23.5835	23.5444	22.5168	0.319722	0.00927601
Q96Q06	PLIN4	Down	26.2723	26.1513	26.2782	19.0199	21.3044	22.8723	0.027807	0.00989813
B3KUB4	CA12	Down	24.8376	24.085	24.5729	21.7629	23.0181	22.6848	0.248289	0.00990175
E9PPQ0	MTFR1L	Down	23.5579	24.0669	24.12	22.3657	21.929	22.8862	0.348378	0.00991693
LFQ, label-free quantification; EC, endometrial cancer; AP, paracancerous.
